# Supplementary material
Source: publisher figshare collection journal article supplement (https://gsajournals.figshare.com/ndownloader/files/13332698)
Supplement: Supplementary file 1 [file 13332698]

## Sheet: Wheat_Grain
lambda_nm	Sigma2_G	Sigma2_GE	Sigma2_e
400	35.8569	24.122	40.0211
402	36.2936	23.9019	39.8045
404	36.7934	23.6475	39.5591
406	37.3656	23.3534	39.2809
408	38.0209	23.0136	38.9655
410	38.7709	22.6212	38.6079
412	39.6279	22.1689	38.2032
414	40.6044	21.6492	37.7464
416	41.7123	21.0547	37.233
418	42.9611	20.3791	36.6598
420	44.356	19.6184	36.0256
422	45.8944	18.7725	35.3331
424	47.5627	17.8475	34.5898
426	49.3317	16.858	33.8103
428	51.1537	15.829	33.0173
430	52.9604	14.7972	32.2424
432	54.6662	13.8094	31.5244
434	56.1756	12.9189	30.9055
436	57.3962	12.178	30.4258
438	58.0189	11.7215	30.2597
440	58.3232	11.4618	30.215
442	58.4264	11.3401	30.2335
444	58.4206	11.3015	30.2779
446	58.3624	11.3048	30.3328
448	58.2743	11.332	30.3937
450	58.157	11.3797	30.4633
452	58.0054	11.4474	30.5472
454	57.8225	11.5325	30.645
456	57.6197	11.6322	30.7481
458	57.408	11.7447	30.8473
460	57.1943	11.8706	30.9352
462	56.9863	12.0035	31.0102
464	56.799	12.1353	31.0657
466	56.65	12.2625	31.0875
468	56.5512	12.3828	31.066
470	56.5103	12.4915	30.9982
472	56.5322	12.5858	30.882
474	56.6108	12.6713	30.7179
476	56.737	12.7562	30.5068
478	56.8973	12.8419	30.2608
480	57.0691	12.9287	30.0021
482	57.2333	13.0119	29.7547
484	57.3712	13.0914	29.5374
486	57.4684	13.174	29.3576
488	57.5141	13.2644	29.2215
490	57.5051	13.3619	29.133
492	57.4463	13.4614	29.0923
494	57.3459	13.556	29.0981
496	57.2113	13.6412	29.1474
498	57.0484	13.7161	29.2354
500	56.8597	13.7823	29.358
502	56.6473	13.8414	29.5113
504	56.4134	13.8971	29.6895
506	56.1614	13.9509	29.8877
508	55.8914	14.0022	30.1063
510	55.6012	14.0498	30.349
512	55.2889	14.0933	30.6177
514	54.9536	14.1317	30.9147
516	54.5916	14.1649	31.2435
518	54.1951	14.1939	31.611
520	53.7545	14.2218	32.0237
522	53.2634	14.2516	32.485
524	52.7157	14.2858	32.9985
526	52.1105	14.3277	33.5618
528	51.4501	14.383	34.1669
530	50.7421	14.4564	34.8015
532	50.0002	14.5521	35.4478
534	49.2403	14.6783	36.0814
536	48.4826	14.8396	36.6778
538	47.7467	15.0381	37.2153
540	47.0483	15.2718	37.6799
542	46.3991	15.5361	38.0649
544	45.8014	15.8265	38.3721
546	45.2508	16.1384	38.6109
548	44.739	16.4676	38.7934
550	44.2575	16.8056	38.9369
552	43.8005	17.1466	39.053
554	43.3651	17.4873	39.1476
556	42.9487	17.8243	39.2271
558	42.5488	18.1574	39.2938
560	42.1671	18.4866	39.3463
562	41.8126	18.8051	39.3823
564	41.4994	19.1033	39.3973
566	41.2455	19.3702	39.3844
568	41.0702	19.5956	39.3342
570	40.9914	19.7715	39.2371
572	41.0254	19.8889	39.0857
574	41.1852	19.9404	38.8744
576	41.4768	19.9217	38.6014
578	41.9068	19.8286	38.2646
580	42.4757	19.6591	37.8652
582	43.1751	19.4143	37.4106
584	43.994	19.0983	36.9077
586	44.9177	18.7181	36.3642
588	45.9226	18.2865	35.7909
590	46.975	17.8205	35.2045
592	48.0382	17.3398	34.622
594	49.0793	16.8636	34.0572
596	50.0735	16.4068	33.5197
598	50.9969	15.9824	33.0207
600	51.8308	15.6019	32.5673
602	52.5615	15.2741	32.1644
604	53.1784	15.0054	31.8162
606	53.6792	14.7993	31.5215
608	54.0663	14.6566	31.2772
610	54.3389	14.5771	31.084
612	54.4972	14.5617	30.9411
614	54.5452	14.6077	30.8471
616	54.4872	14.7137	30.7991
618	54.3271	14.8773	30.7956
620	54.07	15.0954	30.8346
622	53.7234	15.3638	30.9128
624	53.2906	15.6806	31.0288
626	52.7821	16.0399	31.178
628	52.2119	16.4342	31.3539
630	51.5951	16.8553	31.5497
632	50.9469	17.294	31.7591
634	50.2868	17.739	31.9742
636	49.6338	18.1804	32.1858
638	49.0056	18.6095	32.3849
640	48.4195	19.0174	32.5632
642	47.8867	19.3972	32.7162
644	47.4152	19.745	32.8399
646	47.0086	20.0583	32.9331
648	46.667	20.3349	32.9981
650	46.3871	20.5747	33.0382
652	46.1651	20.7776	33.0573
654	45.9958	20.9436	33.0606
656	45.8753	21.0722	33.0524
658	45.7961	21.1655	33.0384
660	45.7522	21.2234	33.0243
662	45.7372	21.2479	33.0149
664	45.746	21.2409	33.0131
666	45.7732	21.2048	33.022
668	45.8145	21.1422	33.0433
670	45.867	21.0547	33.0784
672	45.9288	20.9442	33.127
674	45.999	20.812	33.1891
676	46.0771	20.6595	33.2633
678	46.1609	20.489	33.3501
680	46.2502	20.3028	33.447
682	46.3454	20.1032	33.5513
684	46.4461	19.8923	33.6616
686	46.5501	19.6733	33.7766
688	46.6569	19.4485	33.8946
690	46.7672	19.2194	34.0134
692	46.8803	18.9886	34.1311
694	46.9959	18.7588	34.2453
696	47.1146	18.5316	34.3537
698	47.2389	18.3087	34.4523
700	47.3707	18.0919	34.5374
702	47.5109	17.8829	34.6062
704	47.6607	17.6824	34.6569
706	47.8204	17.4909	34.6887
708	47.9891	17.3089	34.702
710	48.1651	17.1365	34.6984
712	48.3455	16.9736	34.6809
714	48.5285	16.8193	34.6522
716	48.7111	16.6729	34.616
718	48.8886	16.5344	34.5771
720	49.0566	16.4033	34.5401
722	49.2102	16.2787	34.511
724	49.3459	16.1613	34.4927
726	49.463	16.051	34.486
728	49.5624	15.947	34.4906
730	49.6446	15.8491	34.5063
732	49.7095	15.7572	34.5333
734	49.7582	15.6708	34.571
736	49.7916	15.5898	34.6186
738	49.812	15.5144	34.6736
740	49.8227	15.4446	34.7327
742	49.8248	15.3805	34.7947
744	49.8187	15.3216	34.8597
746	49.8042	15.2669	34.9289
748	49.7814	15.2155	35.0031
750	49.7519	15.1664	35.0817
752	49.7161	15.12	35.1639
754	49.6747	15.0765	35.2488
756	49.6284	15.036	35.3355
758	49.578	14.9984	35.4236
760	49.5231	14.964	35.5129
762	49.4638	14.9327	35.6035
764	49.4024	14.9032	35.6944
766	49.3394	14.8755	35.7851
768	49.2746	14.8503	35.8751
770	49.2085	14.8266	35.9649
772	49.1418	14.8047	36.0535
774	49.0741	14.7857	36.1403
776	49.007	14.7686	36.2244
778	48.941	14.7531	36.3059
780	48.8759	14.7388	36.3853
782	48.8119	14.7258	36.4623
784	48.7507	14.7138	36.5355
786	48.6936	14.7024	36.604
788	48.6397	14.6916	36.6688
790	48.588	14.6818	36.7302
792	48.5365	14.6732	36.7903
794	48.4834	14.6659	36.8506
796	48.4263	14.6603	36.9134
798	48.3627	14.6578	36.9795
800	48.2929	14.6581	37.049
802	48.2188	14.6612	37.12
804	48.1412	14.6672	37.1916
806	48.0603	14.6759	37.2637
808	47.9767	14.6878	37.3355
810	47.8912	14.7039	37.4048
812	47.8052	14.7251	37.4697
814	47.7204	14.7514	37.5282
816	47.6377	14.7818	37.5805
818	47.5571	14.8143	37.6286
820	47.4777	14.8464	37.6759
822	47.396	14.8776	37.7264
824	47.313	14.907	37.78
826	47.2297	14.9343	37.836
828	47.1473	14.9598	37.8929
830	47.0674	14.9837	37.9489
832	46.9903	15.0057	38.0039
834	46.9181	15.0246	38.0574
836	46.8499	15.0415	38.1086
838	46.7875	15.0554	38.1571
840	46.7331	15.0651	38.2018
842	46.6882	15.0703	38.2414
844	46.6548	15.0699	38.2754
846	46.6317	15.0645	38.3038
848	46.6186	15.0555	38.3259
850	46.6191	15.042	38.3389
852	46.6341	15.0238	38.3421
854	46.6638	15.0015	38.3346
856	46.7087	14.9757	38.3156
858	46.7719	14.9467	38.2814
860	46.8546	14.9151	38.2302
862	46.9544	14.8828	38.1628
864	47.0694	14.8519	38.0787
866	47.1971	14.8238	37.9791
868	47.3352	14.8007	37.8641
870	47.4783	14.7864	37.7354
872	47.6202	14.7836	37.5963
874	47.7534	14.7943	37.4524
876	47.8722	14.8199	37.3079
878	47.9702	14.8612	37.1686
880	48.0428	14.9173	37.0399
882	48.0857	14.9874	36.9269
884	48.0957	15.0702	36.8342
886	48.0709	15.1625	36.7666
888	48.0096	15.2621	36.7283
890	47.9124	15.3656	36.722
892	47.7806	15.4704	36.749
894	47.6137	15.5759	36.8104
896	47.4073	15.6817	36.9111
898	47.1568	15.789	37.0541
900	46.8602	15.899	37.2408
902	46.5088	16.0171	37.4741
904	46.0959	16.1486	37.7555
906	45.613	16.2985	38.0885
908	45.0545	16.472	38.4735
910	44.4159	16.6751	38.9091
912	43.6932	16.9116	39.3952
914	42.8889	17.1822	39.9289
916	42.0097	17.4855	40.5048
918	41.0685	17.8165	41.115
920	40.0851	18.1673	41.7476
922	39.0836	18.5282	42.3882
924	38.0943	18.8876	43.0181
926	37.1498	19.2322	43.6181
928	59.2205	8.46966	32.3098
930	57.7928	8.56988	33.6373
932	56.6254	8.58686	34.7877
934	55.8097	8.49203	35.6983
936	55.4464	8.24415	36.3094
938	55.6145	7.79847	36.587
940	56.3623	7.11513	36.5225
942	57.6854	6.18209	36.1325
944	59.4917	5.04439	35.4639
946	37.6208	19.1107	43.2685
948	38.9198	18.8024	42.2778
950	40.219	18.5866	41.1944
952	41.4091	18.4931	40.0978
954	42.4105	18.5271	39.0625
956	43.1791	18.6759	38.1451
958	43.7048	18.9165	37.3787
960	44.0028	19.2243	36.7729
962	44.1015	19.5772	36.3213
964	44.0342	19.9571	36.0088
966	43.8334	20.35	35.8166
968	43.5268	20.7461	35.7271
970	43.1379	21.1381	35.724
972	42.6842	21.5216	35.7942
974	42.1757	21.8951	35.9292
976	41.6204	22.2569	36.1227
978	41.0166	22.6088	36.3745
980	40.3611	22.9517	36.6872
982	39.646	23.2877	37.0663
984	38.8621	23.6166	37.5213
986	37.9947	23.9389	38.0664
988	37.0295	24.2497	38.7208
990	35.9496	24.5404	39.51
992	34.7356	24.796	40.4684
994	53.3685	17.7702	28.8613
996	50.2038	17.5292	32.267
998	46.4258	16.7681	36.8061
1000	42.1109	15.1248	42.7643
1002	37.8396	12.143	50.0174
1004	35.2795	7.79437	56.9262
1006	36.8714	3.5828	59.5458
1008	43.0189	1.5402	55.4409
1010	50.5673	1.39005	48.0427
1012	56.6086	2.01381	41.3776
1014	60.6523	2.88772	36.46
1016	63.2318	3.79891	32.9693
1018	39.7016	16.8409	43.4575
1020	40.4563	17.0434	42.5003
1022	40.9991	17.2447	41.7561
1024	41.3967	17.4294	41.1739
1026	41.6951	17.5932	40.7117
1028	41.923	17.7369	40.3401
1030	42.1006	17.862	40.0375
1032	42.2408	17.9707	39.7885
1034	42.3518	18.066	39.5822
1036	42.4387	18.1507	39.4106
1038	42.5037	18.2278	39.2685
1040	42.5466	18.3004	39.153
1042	42.5669	18.372	39.0611
1044	42.5627	18.4458	38.9915
1046	42.5341	18.5225	38.9435
1048	42.4779	18.6058	38.9163
1050	42.3909	18.6968	38.9123
1052	42.2741	18.7963	38.9297
1054	42.1257	18.9028	38.9715
1056	41.9438	19.0171	39.0391
1058	41.7258	19.1417	39.1324
1060	41.4759	19.2797	39.2445
1062	41.1995	19.4293	39.3712
1064	40.6844	19.6682	39.6475
1066	39.9813	19.9583	40.0603
1068	39.0342	20.293	40.6729
1070	37.7868	20.6648	41.5484
1072	58.3105	12.8998	28.7897
1074	54.5344	13.1033	32.3623
1076	49.4073	13.2929	37.2998
1078	42.6195	13.6209	43.7595
1080	34.2394	14.4574	51.3032
1082	25.3878	16.3576	58.2546
1084	18.3209	19.6796	61.9995
1086	14.8927	23.6468	61.4605
1088	15.3644	26.1232	58.5124
1090	19.1463	25.5992	55.2545
1092	25.4136	22.3157	52.2707
1094	33.1783	17.6544	49.1673
1096	41.3756	13.2214	45.4031
1098	49.0376	9.99852	40.9639
1100	55.4836	8.05009	36.4663
1102	60.4595	7.01596	32.5245
1104	64.066	6.53708	29.3969
1106	41.3068	17.011	41.6822
1108	42.4354	16.7376	40.827
1110	43.2037	16.6034	40.1929
1112	43.7088	16.5604	39.7308
1114	44.0275	16.5774	39.3951
1116	44.2148	16.6341	39.1511
1118	44.309	16.7177	38.9733
1120	44.3372	16.8204	38.8424
1122	44.3191	16.9369	38.7439
1124	44.2681	17.0638	38.668
1126	44.1931	17.1978	38.609
1128	44.1005	17.3362	38.5634
1130	43.9949	17.477	38.528
1132	43.879	17.6186	38.5025
1134	43.753	17.7588	38.4882
1136	43.6159	17.8981	38.4861
1138	43.4839	18.0485	38.4676
1140	43.3413	18.1924	38.4663
1142	43.1896	18.3335	38.477
1144	43.028	18.474	38.498
1146	42.8555	18.6152	38.5293
1148	42.6714	18.7575	38.5711
1150	42.475	18.9008	38.6242
1152	42.2652	19.0465	38.6883
1154	42.0405	19.197	38.7625
1156	41.7992	19.3544	38.8463
1158	41.5398	19.5194	38.9407
1160	41.2607	19.6931	39.0462
1162	40.9603	19.8764	39.1633
1164	40.6371	20.07	39.2929
1166	40.2893	20.2752	39.4355
1168	39.9158	20.4934	39.5907
1170	39.5162	20.725	39.7588
1172	39.0891	20.9699	39.9409
1174	38.6329	21.2295	40.1376
1176	38.145	21.5056	40.3493
1178	37.6202	21.8017	40.5781
1180	37.05	22.123	40.827
1182	36.4209	22.4783	41.1009
1184	57.2049	16.414	26.3811
1186	55.7543	17.1306	27.1151
1188	53.9858	18.011	28.0032
1190	51.7323	19.1507	29.117
1192	48.7034	20.7238	30.5729
1194	44.3723	23.08	32.5477
1196	37.7231	27.0136	35.2633
1198	26.7401	34.5814	38.6785
1200	8.22919	51.3222	40.4486
1202	0	71.2632	28.7368
1204	1.08434	70.797	28.1187
1206	63.2828	9.10318	27.614
1208	47.8261	14.0013	38.1725
1210	47.9092	14.6158	37.4751
1212	46.9047	15.517	37.5782
1214	45.8806	16.277	37.8424
1216	44.9924	16.8868	38.1208
1218	44.2409	17.3806	38.3786
1220	43.6017	17.7905	38.6078
1222	43.0499	18.1387	38.8114
1224	42.5643	18.4416	38.9941
1226	42.1298	18.7116	39.1586
1228	41.7361	18.9547	39.3092
1230	41.3755	19.1762	39.4483
1232	41.0422	19.3819	39.5759
1234	40.7303	19.5741	39.6956
1236	40.4354	19.7556	39.809
1238	40.155	19.9303	39.9147
1240	39.8884	20.0981	40.0135
1242	39.6349	20.2564	40.1087
1244	39.3913	20.4059	40.2027
1246	39.155	20.5493	40.2958
1248	38.9232	20.6883	40.3885
1250	38.691	20.8224	40.4866
1252	38.4517	20.9518	40.5965
1254	38.1947	21.0804	40.7249
1256	37.9074	21.2131	40.8795
1258	37.5774	21.3527	41.0699
1260	37.1872	21.5015	41.3113
1262	36.7184	21.6629	41.6188
1264	57.9242	14.7985	27.2773
1266	56.7685	15.0131	28.2184
1268	55.3724	15.2362	29.3914
1270	53.6862	15.4607	30.8531
1272	51.6568	15.6799	32.6633
1274	49.2302	15.8864	34.8835
1276	46.3381	16.0789	37.583
1278	42.9035	16.2613	40.8352
1280	38.8586	16.4503	44.6911
1282	34.1847	16.6874	49.1279
1284	28.9975	17.0281	53.9743
1286	23.6617	17.5062	58.8321
1288	18.8367	18.1028	63.0605
1290	15.3894	18.7148	65.8958
1292	14.035	19.103	66.862
1294	15.0523	18.8576	66.0901
1296	18.3544	17.6143	64.0313
1298	23.6347	15.377	60.9883
1300	30.3685	12.592	57.0395
1302	37.8179	9.90362	52.2784
1304	45.1216	7.75939	47.119
1306	51.5539	6.31804	42.1281
1308	56.7419	5.52549	37.7326
1310	60.6647	5.23099	34.1043
1312	63.4989	5.28338	31.2177
1314	65.4848	5.55171	28.9635
1316	41.388	15.924	42.688
1318	42.0403	16.1851	41.7747
1320	42.4858	16.4451	41.0691
1322	42.78	16.6858	40.5342
1324	42.9662	16.9008	40.1329
1326	43.0773	17.0885	39.8342
1328	43.1365	17.2481	39.6153
1330	43.1616	17.3808	39.4577
1332	43.1643	17.4891	39.3466
1334	43.1531	17.5747	39.2722
1336	43.1357	17.6384	39.2259
1338	43.1187	17.6811	39.2002
1340	43.1079	17.7022	39.1899
1342	43.109	17.7	39.191
1344	43.1267	17.6715	39.2018
1346	43.1639	17.6133	39.2228
1348	43.2211	17.5241	39.2548
1350	43.2969	17.4029	39.3002
1352	43.3866	17.2485	39.3649
1354	43.4822	17.0591	39.4588
1356	43.5743	16.832	39.5938
1358	43.6504	16.5652	39.7844
1360	43.6935	16.257	40.0495
1362	43.6844	15.9081	40.4075
1364	43.6024	15.52	40.8776
1366	43.4266	15.096	41.4774
1368	43.1389	14.6415	42.2196
1370	42.7242	14.1616	43.1142
1372	42.1713	13.6624	44.1663
1374	67.1917	3.73665	29.0717
1376	66.0073	2.98182	31.0109
1378	64.5691	2.14516	33.2857
1380	62.8512	1.20288	35.9459
1382	60.7127	0.253969	39.0333
1384	57.3529	0.161588	42.4855
1386	52.5992	0.0532094	47.3476
1388	49.0733	0.0353169	50.8914
1390	48.8867	0.0609113	51.0524
1392	48.0016	0.733238	51.2652
1394	47.4741	3.0465	49.4794
1396	48.8894	5.20458	45.906
1398	51.9172	7.02602	41.0567
1400	55.5953	8.51204	35.8926
1402	58.994	9.70496	31.301
1404	38.0669	19.8878	42.0453
1406	39.18	20.3955	40.4245
1408	39.9324	20.5972	39.4705
1410	40.4013	20.5984	39.0003
1412	40.6612	20.4772	38.8616
1414	40.7729	20.285	38.9421
1416	40.7847	20.0566	39.1587
1418	40.7339	19.8136	39.4526
1420	40.6469	19.5679	39.7852
1422	40.5413	19.3255	40.1332
1424	40.4277	19.0897	40.4825
1426	40.3144	18.8614	40.8242
1428	40.2069	18.641	41.152
1430	40.1082	18.4297	41.462
1432	40.0199	18.2286	41.7515
1434	39.9429	18.0372	42.0199
1436	39.8752	17.8532	42.2716
1438	39.8113	17.6763	42.5125
1440	39.7448	17.5076	42.7476
1442	39.6674	17.3438	42.9887
1444	63.8654	6.92292	29.2117
1446	63.6562	6.69224	29.6516
1448	63.3418	6.45809	30.2001
1450	62.859	6.2218	30.9192
1452	62.1102	5.9924	31.8974
1454	60.941	5.78342	33.2756
1456	59.1017	5.61793	35.2804
1458	56.1716	5.57403	38.2544
1460	51.4509	5.82639	42.7227
1462	43.8625	6.80618	49.3314
1464	32.2548	9.4856	58.2596
1466	16.8499	14.9875	68.1626
1468	2.00249	19.4075	78.59
1470	0	16.1553	83.8447
1472	4.2993	13.2073	82.4934
1474	19.0787	14.0899	66.8314
1476	30.9766	15.1471	53.8763
1478	39.1655	15.3028	45.5316
1480	44.7794	15.125	40.0956
1482	48.7266	14.8675	36.4059
1484	51.5737	14.6124	33.8139
1486	53.6798	14.3947	31.9255
1488	55.2794	14.2235	30.497
1490	56.5304	14.0862	29.3834
1492	57.5229	13.9776	28.4994
1494	36.2295	21.9436	41.8269
1496	36.5929	21.8643	41.5428
1498	36.8864	21.81	41.3036
1500	37.1224	21.7815	41.0961
1502	37.3126	21.7731	40.9143
1504	37.4593	21.7822	40.7586
1506	37.5634	21.8107	40.6259
1508	37.628	21.8567	40.5153
1510	37.6544	21.9178	40.4278
1512	37.6451	22.0003	40.3546
1514	37.602	22.1039	40.2941
1516	37.5252	22.2251	40.2497
1518	37.413	22.3627	40.2243
1520	37.2639	22.5128	40.2234
1522	37.0828	22.6778	40.2394
1524	36.8707	22.8595	40.2698
1526	36.6295	23.049	40.3215
1528	36.3613	23.2392	40.3995
1530	36.0663	23.4247	40.509
1532	35.7497	23.6098	40.6405
1534	35.4152	23.7983	40.7865
1536	56.1759	17.5745	26.2496
1538	55.527	17.8087	26.6643
1540	54.8831	18.0168	27.1001
1542	54.2655	18.2016	27.5328
1544	53.6951	18.3377	27.9672
1546	53.1916	18.4188	28.3896
1548	52.7865	18.467	28.7464
1550	52.5153	18.465	29.0197
1552	52.3954	18.3907	29.214
1554	52.4381	18.2546	29.3073
1556	52.6585	18.0574	29.2841
1558	53.0587	17.8046	29.1368
1560	53.6252	17.5068	28.868
1562	54.3225	17.1716	28.506
1564	55.1278	16.7987	28.0735
1566	56.0077	16.3864	27.6059
1568	56.9144	15.9505	27.135
1570	36.073	22.9259	41.0011
1572	36.5659	22.6478	40.7863
1574	37.0408	22.3803	40.5789
1576	37.4908	22.1163	40.3928
1578	37.9013	21.857	40.2417
1580	38.2709	21.6112	40.1179
1582	38.6021	21.3831	40.0149
1584	38.8928	21.171	39.9362
1586	39.1461	20.9798	39.874
1588	39.3665	20.814	39.8195
1590	39.554	20.6693	39.7766
1592	39.7114	20.5377	39.7509
1594	39.8456	20.4197	39.7347
1596	39.9627	20.3193	39.718
1598	40.0634	20.2314	39.7051
1600	40.1475	20.1521	39.7004
1602	40.2162	20.0813	39.7025
1604	40.2715	20.0216	39.7069
1606	40.3184	19.9755	39.7061
1608	40.3529	19.9424	39.7046
1610	40.3785	19.9181	39.7034
1612	40.3998	19.8956	39.7046
1614	40.4163	19.8766	39.7071
1616	40.4278	19.8655	39.7067
1618	40.4379	19.861	39.7011
1620	40.4472	19.8632	39.6896
1622	40.4572	19.8675	39.6753
1624	40.4683	19.8739	39.6578
1626	40.4797	19.8869	39.6334
1628	40.4926	19.9049	39.6025
1630	40.5073	19.9274	39.5653
1632	40.5268	19.9571	39.516
1634	40.5546	19.9888	39.4566
1636	40.5867	20.0223	39.391
1638	40.6216	20.0614	39.317
1640	40.6594	20.1063	39.2343
1642	40.6972	20.156	39.1468
1644	40.7331	20.2038	39.063
1646	40.7683	20.2433	38.9884
1648	40.8037	20.2726	38.9237
1650	40.8362	20.2772	38.8865
1652	40.8585	20.2137	38.9278
1654	40.8747	20.0235	39.1018
1656	40.8995	19.6458	39.4547
1658	40.9717	19.0275	40.0008
1660	41.1464	18.1835	40.6701
1662	41.3945	17.2975	41.3081
1664	41.5963	16.6535	41.7502
1666	41.684	16.3743	41.9417
1668	41.6804	16.367	41.9526
1670	41.6333	16.4903	41.8764
1672	41.5777	16.6626	41.7597
1674	41.5277	16.8505	41.6217
1676	41.4838	17.0364	41.4798
1678	41.4484	17.2027	41.3489
1680	41.4214	17.3484	41.2302
1682	41.4058	17.4791	41.1151
1684	41.4001	17.597	41.0029
1686	41.4037	17.7091	40.8871
1688	41.4163	17.8166	40.7671
1690	41.4354	17.9171	40.6476
1692	41.4572	18.0157	40.5272
1694	41.4806	18.1138	40.4057
1696	41.5016	18.2147	40.2838
1698	41.5127	18.3246	40.1627
1700	41.5127	18.4445	40.0428
1702	41.5061	18.576	39.9179
1704	41.4886	18.7243	39.7871
1706	41.4487	18.8939	39.6575
1708	41.3834	19.085	39.5316
1710	41.292	19.2992	39.4088
1712	41.1627	19.541	39.2964
1714	40.969	19.818	39.213
1716	40.6834	20.1276	39.189
1718	40.2895	20.4645	39.246
1720	39.7728	20.8254	39.4018
1722	39.1228	21.1937	39.6835
1724	38.361	21.54	40.099
1726	60.2846	14.011	25.7044
1728	58.8514	14.6304	26.5182
1730	57.5439	15.0939	27.3622
1732	56.4536	15.3906	28.1558
1734	55.6085	15.5181	28.8734
1736	55.0043	15.5164	29.4793
1738	54.6004	15.4197	29.9799
1740	54.3294	15.267	30.4036
1742	54.1261	15.0978	30.7761
1744	53.9546	14.9277	31.1177
1746	53.785	14.7749	31.4401
1748	53.572	14.6402	31.7878
1750	53.2786	14.5104	32.211
1752	52.9269	14.3641	32.7091
1754	52.5935	14.1561	33.2504
1756	52.3787	13.7876	33.8337
1758	52.4152	13.0901	34.4947
1760	52.8041	11.7265	35.4694
1762	53.5645	9.3489	37.0866
1764	54.6089	6.52995	38.8612
1766	55.8489	5.06413	39.087
1768	57.3397	5.38858	37.2717
1770	59.1293	6.10851	34.7622
1772	60.9993	6.66852	32.3321
1774	62.6424	7.10214	30.2555
1776	39.7553	16.328	43.9168
1778	40.3369	16.6073	43.0558
1780	40.7606	16.8667	42.3727
1782	41.0585	17.0998	41.8418
1784	41.2548	17.313	41.4322
1786	41.3786	17.5063	41.1151
1788	41.4548	17.6706	40.8745
1790	41.4911	17.8093	40.6996
1792	41.4911	17.9333	40.5756
1794	41.4684	18.048	40.4836
1796	41.4269	18.1601	40.413
1798	41.359	18.272	40.369
1800	41.2674	18.3796	40.3531
1802	41.146	18.4714	40.3826
1804	40.9865	18.534	40.4795
1806	40.792	18.5733	40.6347
1808	40.5685	18.5961	40.8353
1810	40.307	18.6081	41.0849
1812	39.9895	18.6294	41.3811
1814	39.5987	18.6813	41.7199
1816	39.1162	18.7696	42.1143
1818	38.512	18.8929	42.5951
1820	60.418	10.7191	28.8629
1822	58.6235	11.178	30.1985
1824	56.224	11.8174	31.9586
1826	53.0277	12.7456	34.2267
1828	48.8296	14.1135	37.0569
1830	43.4605	16.0778	40.4617
1832	36.8618	18.7518	44.3864
1834	29.1708	22.1245	48.7048
1836	20.8494	25.8672	53.2834
1838	12.6779	29.1009	58.2213
1840	5.67859	30.3439	63.9775
1842	1.18308	28.2984	70.5185
1844	1.2468	24.2009	74.5523
1846	7.15623	21.4924	71.3513
1848	15.8439	20.6626	63.4935
1850	24.0997	20.593	55.3073
1852	31.0032	20.4977	48.4991
1854	36.6459	20.1659	43.1882
1856	41.2963	19.6377	39.066
1858	45.1621	19.0052	35.8326
1860	48.3952	18.3399	33.2649
1862	51.1167	17.6796	31.2037
1864	53.4211	17.0436	29.5354
1866	55.375	16.4432	28.1818
1868	57.0339	15.8821	27.0839
1870	36.3476	22.8433	40.8091
1872	37.0318	22.5156	40.4526
1874	37.6305	22.2026	40.1669
1876	38.1582	21.905	39.9368
1878	38.6279	21.6232	39.7489
1880	39.0489	21.3548	39.5963
1882	39.4286	21.0966	39.4749
1884	39.7746	20.8467	39.3787
1886	40.0923	20.6036	39.3041
1888	40.3847	20.3645	39.2508
1890	40.6552	20.1276	39.2172
1892	40.9057	19.8937	39.2006
1894	41.1368	19.6645	39.1987
1896	41.3499	19.4398	39.2104
1898	41.5471	19.218	39.235
1900	41.7312	18.9977	39.2711
1902	41.9033	18.7783	39.3184
1904	42.0628	18.5591	39.378
1906	42.2103	18.3392	39.4505
1908	42.3454	18.1187	39.5359
1910	42.4676	17.8972	39.6352
1912	42.5781	17.6717	39.7502
1914	42.676	17.4398	39.8842
1916	42.7592	17.1996	40.0413
1918	42.8266	16.9504	40.223
1920	42.8759	16.6912	40.4329
1922	42.8993	16.4173	40.6834
1924	42.8891	16.1241	40.9868
1926	42.8323	15.8054	41.3624
1928	42.6992	15.4514	41.8494
1930	42.4365	15.0498	42.5137
1932	41.9326	14.5843	43.4831
1934	40.9277	14.0621	45.0102
1936	62.4408	0.892445	36.6667
1938	54.5768	0.392266	45.031
1940	43.9573	4.06835	51.9744
1942	46.2741	13.0938	40.6322
1944	55.6401	15.3865	28.9734
1946	37.6299	20.0497	42.3204
1948	39.2906	19.5305	41.1789
1950	40.2464	19.0986	40.655
1952	40.8289	18.7662	40.4048
1954	41.203	18.5126	40.2844
1956	41.4584	18.3144	40.2272
1958	41.6402	18.1587	40.2011
1960	41.7727	18.0393	40.188
1962	41.8724	17.9514	40.1762
1964	41.9461	17.8928	40.1611
1966	41.9965	17.8629	40.1406
1968	42.0292	17.8534	40.1174
1970	42.0533	17.8576	40.0892
1972	42.0696	17.8784	40.052
1974	42.0734	17.9184	40.0082
1976	42.066	17.9754	39.9586
1978	42.048	18.048	39.904
1980	42.0145	18.1347	39.8508
1982	41.9666	18.2321	39.8013
1984	41.9032	18.3404	39.7564
1986	41.8155	18.4583	39.7262
1988	41.6961	18.5898	39.7141
1990	41.5424	18.7342	39.7234
1992	41.3488	18.8798	39.7714
1994	41.0985	19.0172	39.8842
1996	40.7728	19.1423	40.0849
1998	40.3499	19.2404	40.4097
2000	39.7985	19.2818	40.9197
2002	39.0807	19.2311	41.6882
2004	38.1455	19.0456	42.8088
2006	36.9209	18.6859	44.3932
2008	55.5218	6.57431	37.9039
2010	50.459	5.78187	43.7591
2012	43.94	5.56425	50.4958
2014	36.5926	5.94908	57.4583
2016	29.9007	6.64205	63.4572
2018	25.3376	7.32333	67.339
2020	23.3023	7.69651	69.0012
2022	23.3333	7.60277	69.0639
2024	24.788	7.07824	68.1338
2026	27.0577	6.27279	66.6695
2028	29.6975	5.35693	64.9455
2030	32.4383	4.4738	63.0879
2032	35.1115	3.70623	61.1823
2034	37.6297	3.07722	59.293
2036	39.9628	2.56821	57.469
2038	41.8146	2.54164	55.6438
2040	43.5201	2.49579	53.9841
2042	45.105	2.41465	52.4804
2044	46.5528	2.31827	51.1289
2046	47.8571	2.21732	49.9256
2048	49.0281	2.11823	48.8536
2050	50.0777	2.01706	47.9053
2052	51.0223	1.91427	47.0634
2054	51.8706	1.81818	46.3112
2056	52.6092	1.73461	45.6562
2058	53.2378	1.66224	45.1
2060	53.7655	1.59752	44.637
2062	54.2028	1.5408	44.2564
2064	54.5684	1.492	43.9396
2066	54.867	1.45672	43.6763
2068	55.087	1.43769	43.4753
2070	55.203	1.43154	43.3654
2072	55.1895	1.43829	43.3722
2074	55.052	1.4618	43.4862
2076	54.7782	1.50577	43.716
2078	54.3633	1.56614	44.0705
2080	53.7717	1.64864	44.5797
2082	52.9189	1.77274	45.3084
2084	51.7432	1.94189	46.3149
2086	50.1544	2.17661	47.669
2088	48.0154	2.52573	49.4589
2090	45.1621	3.07109	51.7668
2092	41.2972	3.95345	54.7494
2094	35.6737	5.56702	58.7593
2096	26.7917	8.9506	64.2577
2098	23.9254	8.73367	67.3409
2100	22.5996	9.7165	67.6839
2102	25.1968	15.7348	59.0684
2104	36.2715	18.8197	44.9088
2106	49.2775	18.465	32.2575
2108	35.7863	23.1031	41.1106
2110	38.7563	21.0097	40.2339
2112	40.5482	19.3805	40.0713
2114	41.608	18.2102	40.1818
2116	42.2324	17.3714	40.3962
2118	42.5909	16.7381	40.671
2120	42.8135	16.2415	40.945
2122	42.9865	15.8315	41.1819
2124	43.1176	15.4844	41.3979
2126	43.2099	15.2155	41.5746
2128	43.272	15.0272	41.7007
2130	43.3184	14.868	41.8137
2132	43.3536	14.7206	41.9257
2134	43.3791	14.6116	42.0094
2136	43.3882	14.5418	42.0699
2138	43.374	14.4969	42.1291
2140	43.3385	14.4629	42.1987
2142	43.2974	14.4345	42.2681
2144	43.2571	14.4281	42.3148
2146	43.2127	14.4513	42.3361
2148	43.1528	14.4852	42.362
2150	43.077	14.5171	42.4059
2152	42.9886	14.5622	42.4493
2154	42.9012	14.6275	42.4714
2156	42.8302	14.7087	42.4611
2158	42.7645	14.8091	42.4264
2160	42.6972	14.9162	42.3866
2162	42.6243	15.0109	42.3649
2164	42.5538	15.0981	42.3481
2166	42.4952	15.1868	42.318
2168	42.4428	15.2756	42.2816
2170	42.3942	15.3629	42.2429
2172	42.3508	15.4518	42.1974
2174	42.3091	15.5422	42.1487
2176	42.2727	15.6325	42.0949
2178	42.2348	15.7262	42.039
2180	42.1907	15.8214	41.9879
2182	42.145	15.9229	41.9321
2184	42.1088	16.0338	41.8574
2186	42.0731	16.1544	41.7725
2188	42.0293	16.2817	41.689
2190	41.9819	16.4187	41.5994
2192	41.9293	16.5695	41.5012
2194	41.8758	16.7292	41.395
2196	41.8303	16.8835	41.2862
2198	41.7802	17.0263	41.1935
2200	41.7257	17.1842	41.09
2202	41.6827	17.3694	40.9479
2204	41.652	17.5541	40.7939
2206	41.6241	17.7567	40.6192
2208	41.6193	17.9986	40.3821
2210	41.6545	18.2772	40.0683
2212	41.7615	18.5967	39.6418
2214	42.0106	18.9265	39.0629
2216	42.5563	19.1909	38.2528
2218	43.6788	19.2431	37.0781
2220	45.8028	18.6053	35.5919
2222	48.7919	16.5371	34.671
2224	50.3073	13.6784	36.0143
2226	49.0473	12.2292	38.7235
2228	47.074	12.2678	40.6582
2230	45.518	12.8045	41.6775
2232	44.4533	13.3682	42.1784
2234	43.7334	13.8326	42.434
2236	43.2244	14.2201	42.5555
2238	42.8513	14.5527	42.5961
2240	42.5639	14.8291	42.607
2242	42.3261	15.0566	42.6173
2244	42.1189	15.2481	42.633
2246	41.9363	15.4172	42.6466
2248	41.7758	15.5793	42.6449
2250	41.6268	15.7309	42.6423
2252	41.4884	15.8583	42.6533
2254	41.3656	15.9712	42.6632
2256	41.2572	16.075	42.6678
2258	41.1547	16.1661	42.6792
2260	41.0563	16.2501	42.6936
2262	40.9618	16.33	42.7082
2264	40.8709	16.4054	42.7237
2266	40.7868	16.471	42.7422
2268	40.7093	16.5308	42.7599
2270	40.6315	16.5905	42.778
2272	40.5607	16.6585	42.7808
2274	40.4916	16.7218	42.7866
2276	40.4145	16.7705	42.815
2278	40.3356	16.8253	42.839
2280	40.254	16.8863	42.8597
2282	40.1553	16.9487	42.8961
2284	40.0471	17.0083	42.9446
2286	39.9278	17.0666	43.0057
2288	39.8026	17.139	43.0584
2290	39.681	17.2549	43.0641
2292	39.579	17.4019	43.0191
2294	39.5446	17.56	42.8955
2296	39.5863	17.7145	42.6991
2298	39.7388	17.8255	42.4356
2300	40.1022	17.8573	42.0404
2302	40.7201	17.7857	41.4942
2304	41.5988	17.6321	40.7691
2306	42.7469	17.379	39.8741
2308	44.1234	16.9919	38.8847
2310	45.5828	16.5672	37.85
2312	46.9695	16.1246	36.9058
2314	48.1116	15.7178	36.1706
2316	48.8943	15.4579	35.6478
2318	49.3253	15.3274	35.3473
2320	49.4688	15.2753	35.2559
2322	49.4093	15.2758	35.3149
2324	49.1712	15.352	35.4768
2326	48.7189	15.5366	35.7445
2328	48.0288	15.7218	36.2494
2330	47.049	15.9395	37.0116
2332	45.678	16.3272	37.9948
2334	43.8932	16.7219	39.3849
2336	41.8802	17.0166	41.1032
2338	39.7323	17.2854	42.9822
2340	60.7048	7.52514	31.7701
2342	55.4764	7.33195	37.1917
2344	49.4647	4.45587	46.0794
2346	43.9674	4.73635	51.2962
2348	39.4473	4.94703	55.6057
2350	35.5102	6.96944	57.5203
2352	32.5042	6.84086	60.6549
2354	30.4254	6.60979	62.9648
2356	28.9744	6.54384	64.4818
2358	28.0563	6.56208	65.3816
2360	27.4228	6.41997	66.1573
2362	26.9151	6.43278	66.6521
2364	27.0493	6.55831	66.3924
2366	28.1803	6.60378	65.2159
2368	30.4574	6.52075	63.0218
2370	33.5739	6.34762	60.0785
2372	37.0136	6.30675	56.6796
2374	40.6603	6.43987	52.8999
2376	44.3822	6.59443	49.0233
2378	48.1349	6.95575	44.9093
2380	51.5266	7.72405	40.7493
2382	54.2593	8.67105	37.0696
2384	56.4006	9.51849	34.0809
2386	36.1224	20.4857	43.3919
2388	36.7589	20.4005	42.8406
2390	37.2548	20.3526	42.3926
2392	37.6501	20.2948	42.0551
2394	37.9877	20.1496	41.8627
2396	38.2974	19.8805	41.8221
2398	38.6184	19.5804	41.8012
2400	38.931	19.2876	41.7814
2402	39.1989	19.0182	41.7829
2404	39.4662	18.7707	41.7631
2406	39.755	18.5288	41.7162
2408	40.0536	18.2428	41.7036
2410	40.3296	17.9252	41.7452
2412	40.5931	17.6105	41.7964
2414	40.8991	17.2897	41.8112
2416	41.2429	16.948	41.8092
2418	41.6175	16.5962	41.7863
2420	41.9885	16.2726	41.7389
2422	42.3537	15.9677	41.6786
2424	42.7582	15.653	41.5888
2426	43.2097	15.3339	41.4564
2428	43.6693	15.0128	41.318
2430	44.1289	14.6997	41.1713
2432	44.6056	14.4425	40.9519
2434	45.0639	14.2397	40.6964
2436	45.4748	14.0638	40.4615
2438	45.8619	13.9067	40.2315
2440	46.2394	13.7839	39.9767
2442	46.6034	13.6615	39.7351
2444	46.9412	13.5544	39.5043
2446	47.2587	13.4606	39.2808
2448	47.541	13.3788	39.0802
2450	47.7738	13.3113	38.9149
2452	47.9817	13.2672	38.7511
2454	48.2133	13.2683	38.5184
2456	48.4459	13.3017	38.2524
2458	48.668	13.3451	37.9868
2460	48.8549	13.3684	37.7768
2462	48.9748	13.431	37.5942
2464	49.1453	13.5024	37.3523
2466	49.3118	13.5823	37.106
2468	49.4727	13.6711	36.8562
2470	49.6261	13.7696	36.6042
2472	49.7701	13.8786	36.3514
2474	49.902	13.9987	36.0993
2476	50.0193	14.1306	35.85
2478	50.1189	14.2751	35.6059
2480	50.1975	14.4327	35.3698
2482	50.2514	14.6039	35.1447
2484	50.2767	14.7892	34.9341
2486	50.2693	14.9887	34.742
2488	50.2249	15.2026	34.5725
2490	50.1392	15.4307	34.4301
2492	50.0081	15.6725	34.3195
2494	49.8276	15.9273	34.2452
2496	49.5943	16.1939	34.2118
2498	49.3056	16.471	34.2234

## Sheet: Wheat_Leaves
lambda_nm	Sigma2_G	Sigma2_GE	Sigma2_e
400	9.33239	0.784247	89.8834
402	9.14003	0.927245	89.9327
404	8.93325	1.09994	89.9668
406	8.7078	1.3092	89.983
408	8.46477	1.56312	89.9721
410	8.2044	1.87131	89.9243
412	7.92858	2.24471	89.8267
414	0	0.748662	99.2513
416	0	0.253327	99.7467
418	0	0.986258	99.0137
420	0	0.342748	99.6573
422	0	6.1653e-16	100
424	0	1.80367e-15	100
426	0	3.02957e-15	100
428	0	4.00741e-15	100
430	0	4.1146e-15	100
432	0	2.57097e-15	100
434	0	1.4316	98.5684
436	0	5.84188	94.1581
438	25.5465	0.725592	73.7279
440	33.0427	0.0976793	66.8596
442	39.9652	0.0484275	59.9864
444	43.5321	0.0024397	56.4654
446	43.6091	0.00012667	56.3908
448	42.0384	0.0136442	57.9479
450	40.6845	0.0184564	59.2971
452	40.4228	0.000257125	59.5769
454	40.1737	0.0467237	59.7796
456	38.9765	0.310883	60.7126
458	37.4391	0.925529	61.6354
460	36.0318	1.70077	62.2675
462	34.5928	2.21857	63.1887
464	33.0526	2.37081	64.5766
466	31.693	2.5038	65.8032
468	30.4375	2.92728	66.6352
470	28.5787	3.64923	67.7721
472	25.8712	4.27487	69.8539
474	23.0779	4.44678	72.4753
476	21.2569	4.40787	74.3352
478	20.3645	4.54533	75.0902
480	19.3462	4.62548	76.0283
482	18.0155	4.43486	77.5496
484	16.8953	4.28308	78.8216
486	16.096	4.4957	79.4083
488	15.4086	5.07062	79.5208
490	14.8415	5.68595	79.4726
492	14.6576	6.05871	79.2837
494	15.063	6.08923	78.8478
496	16.1212	5.77672	78.1021
498	17.7106	5.18877	77.1007
500	19.4971	4.61121	75.8916
502	21.221	4.2932	74.4858
504	22.9932	4.2343	72.7725
506	24.9398	4.50989	70.5503
508	27.1673	4.68567	68.1471
510	29.2836	4.96749	65.7489
512	31.2051	5.58692	63.208
514	33.2292	6.55699	60.2138
516	35.5334	7.53002	56.9366
518	37.4522	8.25277	54.295
520	37.5442	9.01542	53.4404
522	35.2126	10.2518	54.5356
524	30.7187	12.2276	57.0536
526	24.349	15.4079	60.2431
528	16.3977	20.6179	62.9845
530	7.80712	27.9235	64.2694
532	0.264888	35.8274	63.9077
534	0	39.2941	60.7059
536	0	37.2448	62.7552
538	5.95382	27.9839	66.0623
540	16.5106	18.1817	65.3077
542	27.3631	12.4555	60.1814
544	36.6244	9.87196	53.5036
546	43.1369	8.75642	48.1067
548	47.0411	8.31507	44.6439
550	49.0655	8.27623	42.6583
552	49.8941	8.44571	41.6601
554	50.2435	8.5665	41.19
556	50.7549	8.47118	40.7739
558	51.5713	8.15026	40.2784
560	52.3657	7.73573	39.8986
562	52.9275	7.31206	39.7605
564	53.241	6.85999	39.899
566	53.1827	6.29447	40.5229
568	52.5671	5.59831	41.8346
570	51.3803	4.95571	43.664
572	49.8884	4.63259	45.479
574	48.428	4.70846	46.8635
576	46.8801	4.89248	48.2274
578	44.7558	4.92181	50.3224
580	41.8717	4.85307	53.2753
582	38.6153	4.75128	56.6334
584	35.3323	4.53196	60.1358
586	31.9343	4.28541	63.7803
588	28.3222	4.31484	67.363
590	24.4261	4.60373	70.9701
592	20.4121	4.78703	74.8009
594	16.7843	4.6642	78.5515
596	13.7708	4.43339	81.7958
598	11.19	4.36707	84.4429
600	8.67211	4.739	86.5889
602	6.01194	5.72743	88.2606
604	3.10346	7.35132	89.5452
606	0.095578	9.64555	90.2589
608	0	12.4551	87.5449
610	0	16.3527	83.6473
612	0	21.3767	78.6233
614	0	27.0507	72.9493
616	0	32.7852	67.2148
618	0	38.3368	61.6632
620	0	43.4528	56.5472
622	0	47.6797	52.3203
624	0	50.841	49.159
626	0	53.0121	46.9879
628	0	54.1247	45.8753
630	0	54.1305	45.8695
632	0	53.172	46.828
634	0	51.403	48.597
636	0	49.1011	50.8989
638	0	46.5951	53.4049
640	0	43.9515	56.0485
642	0	40.8497	59.1503
644	0	36.869	63.131
646	0	31.6467	68.3533
648	2.48038	24.2543	73.2653
650	11.4724	14.1965	74.3311
652	20.3777	5.66515	73.9571
654	28.7047	1.48706	69.8083
656	38.1971	0.929305	60.8736
658	47.9494	0.482742	51.5679
660	56.5462	0.149809	43.304
662	40.2834	16.4249	43.2917
664	42.9671	15.5276	41.5053
666	44.5904	14.7972	40.6125
668	45.1914	14.2209	40.5877
670	44.8537	13.8077	41.3386
672	43.7127	13.5734	42.7138
674	41.938	13.521	44.541
676	64.2501	1.54119	34.2087
678	59.2988	2.51288	38.1883
680	53.6523	3.73913	42.6085
682	47.5056	5.23979	47.2546
684	41.1432	6.9932	51.8636
686	34.8446	8.95055	56.2048
688	28.8937	11.0343	60.072
690	23.4335	13.1871	63.3795
692	18.584	15.2955	66.1206
694	14.414	17.2721	68.3139
696	10.9426	19.0121	70.0453
698	8.14531	20.4143	71.4404
700	6.03327	21.4016	72.5651
702	4.63249	21.9107	73.4568
704	4.00307	21.8607	74.1362
706	4.30035	21.1319	74.5677
708	5.70202	19.657	74.641
710	8.5725	17.3552	74.0723
712	13.1387	14.3289	72.5324
714	19.4145	10.8009	69.7846
716	26.9576	7.17119	65.8712
718	34.9351	3.94105	61.1239
720	42.619	1.46686	55.9142
722	49.4656	0.0012741	50.5331
724	55.0745	0.0135822	44.912
726	60.2623	0.0438711	39.6939
728	39.5277	18.0273	42.445
730	41.6483	17.5612	40.7905
732	43.3491	17.1228	39.5281
734	44.6888	16.7231	38.5881
736	45.7266	16.3704	37.903
738	46.5267	16.067	37.4063
740	47.138	15.8146	37.0474
742	47.5995	15.6126	36.7879
744	47.9397	15.4577	36.6027
746	48.1762	15.3458	36.4779
748	48.3218	15.2689	36.4093
750	48.3849	15.219	36.3961
752	48.3708	15.1896	36.4395
754	48.2821	15.1762	36.5416
756	48.1167	15.1777	36.7056
758	47.8671	15.1975	36.9353
760	47.5248	15.2429	37.2324
762	47.0772	15.3215	37.6012
764	46.5153	15.4389	38.0459
766	45.8286	15.6028	38.5685
768	45.0053	15.8279	39.1668
770	44.0329	16.1211	39.8461
772	42.9315	16.471	40.5975
774	41.7382	16.8614	41.4003
776	40.4914	17.2799	42.2287
778	39.2352	17.6989	43.0659
780	37.9989	18.0902	43.9109
782	36.8173	18.4347	44.748
784	56.2588	12.8916	30.8495
786	54.1287	13.4045	32.4668
788	52.1566	13.7484	34.095
790	50.3494	13.9228	35.7278
792	48.6664	13.9411	37.3925
794	47.0732	13.8184	39.1084
796	45.5508	13.5615	40.8877
798	44.0859	13.1942	42.72
800	42.5989	12.7684	44.6327
802	41.0527	12.3321	46.6152
804	39.4618	11.9194	48.6187
806	37.8269	11.5718	50.6013
808	36.1654	11.3073	52.5273
810	34.4982	11.1403	54.3615
812	32.8486	11.0711	56.0803
814	31.2326	11.0816	57.6858
816	29.6971	11.1347	59.1682
818	28.2975	11.1915	60.511
820	27.0546	11.2263	61.7192
822	25.9565	11.243	62.8005
824	24.9921	11.241	63.7669
826	24.1376	11.2143	64.6482
828	23.3565	11.1945	65.449
830	22.6483	11.1575	66.1942
832	22.0195	11.0998	66.8807
834	21.4433	11.0289	67.5278
836	20.8956	10.9377	68.1667
838	20.4076	10.7898	68.8026
840	19.9872	10.5881	69.4247
842	19.5863	10.3791	70.0345
844	19.1762	10.1759	70.6479
846	18.7694	9.96173	71.2688
848	18.3734	9.73584	71.8908
850	17.991	9.49607	72.5129
852	17.6233	9.23894	73.1377
854	17.2588	8.97186	73.7693
856	16.9017	8.6908	74.4075
858	16.5641	8.40002	75.0359
860	16.2379	8.11827	75.6439
862	15.9164	7.85289	76.2308
864	15.6056	7.59796	76.7964
866	15.3107	7.35097	77.3384
868	15.0439	7.11099	77.8451
870	14.8017	6.90049	78.2978
872	14.5485	6.76042	78.6911
874	14.2832	6.68331	79.0335
876	14.0624	6.61058	79.327
878	13.9186	6.50608	79.5753
880	13.8321	6.37647	79.7914
882	13.7753	6.24833	79.9764
884	13.7344	6.14266	80.1229
886	13.7001	6.06467	80.2352
888	13.6619	6.01574	80.3224
890	13.6185	5.9968	80.3847
892	13.5833	5.99824	80.4185
894	13.5658	6.00905	80.4252
896	13.5659	6.02389	80.4103
898	13.5796	6.04948	80.3709
900	13.5974	6.09859	80.304
902	13.6056	6.17511	80.2193
904	13.6134	6.25937	80.1272
906	13.6359	6.34177	80.0224
908	13.652	6.44956	79.8984
910	13.6427	6.59602	79.7613
912	13.6188	6.76411	79.6171
914	13.5891	6.94819	79.4627
916	13.5437	7.16407	79.2923
918	13.475	7.41412	79.1108
920	13.3785	7.69637	78.9252
922	13.2529	8.0122	78.7349
924	13.1114	8.35121	78.5373
926	12.9596	8.70028	78.3401
928	12.7984	9.05928	78.1423
930	12.6515	9.4081	77.9404
932	12.5397	9.7272	77.7331
934	12.466	10.015	77.519
936	12.4332	10.2774	77.2894
938	12.4348	10.5277	77.0375
940	12.4638	10.7612	76.7751
942	12.5318	10.9705	76.4977
944	12.627	11.1762	76.1968
946	12.7048	11.4238	75.8714
948	12.7807	11.6876	75.5317
950	12.9301	11.9053	75.1646
952	13.1755	12.0551	74.7694
954	13.4601	12.1544	74.3855
956	13.7315	12.2357	74.0328
958	13.9953	12.2871	73.7175
960	14.2669	12.3234	73.4097
962	14.5329	12.3521	73.115
964	14.7836	12.3658	72.8506
966	15.0365	12.3775	72.586
968	15.3038	12.3856	72.3106
970	15.5877	12.3698	72.0425
972	15.8943	12.3482	71.7575
974	16.2224	12.3247	71.4528
976	16.5514	12.2753	71.1733
978	16.8705	12.2082	70.9213
980	17.2006	12.0903	70.7091
982	17.5377	11.9581	70.5042
984	17.8656	11.8228	70.3116
986	18.1773	11.6541	70.1686
988	18.4671	11.47	70.0629
990	18.7325	11.2545	70.013
992	18.9491	11.0429	70.008
994	19.0983	10.8335	70.0682
996	19.1917	10.5917	70.2166
998	19.2375	10.331	70.4315
1000	19.2223	10.0537	70.724
1002	19.1253	9.75859	71.1161
1004	18.94	9.44384	71.6162
1006	18.6755	9.14278	72.1818
1008	18.3485	8.86381	72.7877
1010	17.962	8.62163	73.4164
1012	17.5262	8.41163	74.0621
1014	17.0551	8.24663	74.6983
1016	16.5619	8.08599	75.3521
1018	16.0658	7.91795	76.0163
1020	15.5867	7.76945	76.6438
1022	15.1125	7.66242	77.2251
1024	14.6496	7.57716	77.7732
1026	14.2098	7.49864	78.2916
1028	13.7084	7.49748	78.7942
1030	13.09	7.60938	79.3007
1032	12.4645	7.73599	79.7995
1034	11.9256	7.81256	80.2619
1036	11.4074	7.88941	80.7032
1038	10.8202	8.03672	81.1431
1040	10.1663	8.2738	81.5599
1042	9.47673	8.59673	81.9265
1044	8.78368	8.96067	82.2556
1046	8.09661	9.32704	82.5764
1048	7.39686	9.71453	82.8886
1050	6.68107	10.1487	83.1702
1052	5.95245	10.6397	83.4078
1054	5.22405	11.1852	83.5908
1056	4.53367	11.745	83.7213
1058	3.88061	12.2985	83.8209
1060	3.21279	12.8962	83.891
1062	2.54935	13.5237	83.927
1064	0	19.7981	80.2019
1066	0	23.395	76.605
1068	0	24.0869	75.9131
1070	0	23.2589	76.7411
1072	0	21.8667	78.1333
1074	0	20.2938	79.7062
1076	0	18.6718	81.3282
1078	0	16.9723	83.0277
1080	0	15.0183	84.9817
1082	0	4.35341	95.6466
1084	0	4.18706	95.8129
1086	0	4.0469	95.9531
1088	0	3.92425	96.0757
1090	0	3.82003	96.18
1092	0	3.72745	96.2726
1094	0	3.65613	96.3439
1096	0	3.59116	96.4088
1098	0	3.53901	96.461
1100	0	3.49598	96.504
1102	0	3.47204	96.528
1104	0	3.44539	96.5546
1106	0	3.43046	96.5695
1108	0	3.31265	96.6874
1110	0	3.14595	96.854
1112	0	10.4575	89.5425
1114	0	12.4434	87.5566
1116	0	14.2555	85.7445
1118	0	16.0889	83.9111
1120	0	17.9602	82.0398
1122	0	19.8777	80.1223
1124	0	21.8028	78.1972
1126	1.58862	23.2313	75.1801
1128	4.64771	23.9973	71.3549
1130	8.27098	24.2864	67.4426
1132	12.2301	24.2405	63.5294
1134	16.0147	23.8852	60.1001
1136	18.524	23.1026	58.3734
1138	18.2585	23.4317	58.3098
1140	18.0637	23.6509	58.2854
1142	17.93	23.7449	58.3251
1144	17.8521	23.7237	58.4242
1146	17.8436	23.5947	58.5617
1148	17.9139	23.3595	58.7266
1150	18.0652	23.0208	58.914
1152	18.299	22.5852	59.1158
1154	18.6372	22.0467	59.3161
1156	19.0859	21.4155	59.4986
1158	19.6478	20.7006	59.6517
1160	20.3105	19.9055	59.784
1162	21.0695	19.024	59.9065
1164	21.9196	18.0726	60.0078
1166	22.8476	17.0832	60.0692
1168	23.84	16.0749	60.0851
1170	24.8965	15.0557	60.0478
1172	26.0068	14.0247	59.9684
1174	27.1372	12.9832	59.8795
1176	28.2698	11.9455	59.7847
1178	29.4317	10.9026	59.6657
1180	30.6541	9.81249	59.5334
1182	31.9673	8.63711	59.3956
1184	33.3943	7.36021	59.2455
1186	34.9441	5.96755	59.0883
1188	36.6305	4.43272	58.9367
1190	38.4429	2.73625	58.8209
1192	40.33	0.874247	58.7957
1194	41.2475	0.145614	58.6069
1196	41.2193	0.282492	58.4982
1198	41.6741	0.656958	57.6689
1200	42.7569	0.0949946	57.1481
1202	43.2935	0.0882599	56.6183
1204	44.3466	0.072088	55.5814
1206	42.9209	0.121992	56.9571
1208	39.1638	1.02801	59.8082
1210	30.687	7.22948	62.0835
1212	19.2816	15.9093	64.8092
1214	6.78233	24.6811	68.5366
1216	0	30.9005	69.0995
1218	0	34.3798	65.6202
1220	0	37.3053	62.6947
1222	0	39.4046	60.5954
1224	0	40.5482	59.4518
1226	0	40.8876	59.1124
1228	0	40.6663	59.3337
1230	0	40.0468	59.9532
1232	0	39.1517	60.8483
1234	0	38.1246	61.8754
1236	0	37.0667	62.9333
1238	0	35.9892	64.0108
1240	0	34.9277	65.0723
1242	0	33.8989	66.1011
1244	0	32.899	67.101
1246	0	31.9319	68.0681
1248	0	31.0267	68.9733
1250	0	30.1597	69.8403
1252	0	29.3278	70.6722
1254	0	28.5295	71.4705
1256	0	27.7792	72.2208
1258	0	27.0578	72.9422
1260	0	26.3399	73.6601
1262	0	25.6439	74.3561
1264	0	24.9867	75.0133
1266	0	24.3891	75.6109
1268	0	23.8185	76.1815
1270	0	23.2742	76.7258
1272	0	22.7656	77.2344
1274	0	22.2668	77.7332
1276	0	21.762	78.238
1278	0	21.3017	78.6983
1280	0	20.9101	79.0899
1282	0	20.5586	79.4414
1284	0	20.2607	79.7393
1286	0	19.9749	80.0251
1288	0	19.6237	80.3763
1290	0	19.1411	80.8589
1292	0	18.4975	81.5025
1294	0	17.5887	82.4113
1296	0	16.2805	83.7195
1298	0	14.4084	85.5916
1300	0	11.973	88.027
1302	0	9.20518	90.7948
1304	2.19764	6.40407	91.3983
1306	5.24588	4.2213	90.5328
1308	8.69135	2.96799	88.3407
1310	12.4643	2.71158	84.8242
1312	16.2702	3.39452	80.3353
1314	19.7492	4.60336	75.6474
1316	22.7298	5.80392	71.4663
1318	25.2033	6.76878	68.0279
1320	27.2132	7.51372	65.2731
1322	28.8214	8.09118	63.0874
1324	30.0974	8.55089	61.3517
1326	31.0985	8.93855	59.9629
1328	31.8666	9.26567	58.8677
1330	32.4347	9.52052	58.0448
1332	32.8215	9.70188	57.4766
1334	33.0279	9.82161	57.1504
1336	33.0592	9.88029	57.0605
1338	32.9503	9.85799	57.1917
1340	32.7513	9.74677	57.5019
1342	32.5339	9.55012	57.916
1344	32.3506	9.27515	58.3743
1346	32.2211	8.93221	58.8467
1348	32.1724	8.52245	59.3051
1350	32.2624	8.03202	59.7056
1352	32.5163	7.46159	60.0221
1354	32.9334	6.81915	60.2474
1356	33.5229	6.09738	60.3797
1358	34.3007	5.29049	60.4089
1360	35.2448	4.41408	60.3411
1362	36.3233	3.49068	60.1861
1364	37.4673	2.54575	59.987
1366	38.5952	1.60939	59.7954
1368	39.6007	0.702144	59.6972
1370	40.2616	0.0798628	59.6586
1372	40.2493	0.145381	59.6053
1374	40.0162	0.241535	59.7423
1376	39.567	0.376874	60.0562
1378	38.8258	0.559973	60.6142
1380	37.571	0.435216	61.9937
1382	37.9093	0.812127	61.2785
1384	38.0301	1.34455	60.6254
1386	37.9071	2.05363	60.0393
1388	37.4496	2.95511	59.5953
1390	36.5852	4.07319	59.3416
1392	39.9829	0.441043	59.5761
1394	40.1549	0.394513	59.4506
1396	41.5348	1.53242	56.9328
1398	40.3743	0.332137	59.2936
1400	40.4378	0.315483	59.2467
1402	40.4688	0.305939	59.2253
1404	40.4583	0.303118	59.2386
1406	40.4022	0.306894	59.2909
1408	40.3019	0.315684	59.3824
1410	41.0431	0.136469	58.8204
1412	40.6	0.0868264	59.3132
1414	40.0884	0.0474377	59.8642
1416	39.5154	0.0183622	60.4662
1418	38.8853	0.00188484	61.1128
1420	38.1984	0.00420156	61.7974
1422	37.429	0.041757	62.5292
1424	36.4246	0.199261	63.3761
1426	33.7407	1.45863	64.8006
1428	34.0869	0.941393	64.9717
1430	34.1059	0.634425	65.2597
1432	33.9242	0.464899	65.6109
1434	33.6261	0.387533	65.9863
1436	33.2507	0.380744	66.3685
1438	32.8044	0.444006	66.7516
1440	32.2877	0.591382	67.1209
1442	31.6931	0.82923	67.4776
1444	31.0381	1.15842	67.8035
1446	30.3955	1.5231	68.0814
1448	29.8868	1.82216	68.2911
1450	29.6783	1.89322	68.4284
1452	29.9441	1.5427	68.5132
1454	30.475	0.686121	68.8388
1456	30.0829	0.000391812	69.9167
1458	30.5752	0.646387	68.7784
1460	30.8669	0.787274	68.3458
1462	29.523	2.05376	68.4233
1464	27.0441	4.47257	68.4833
1466	24.9102	6.58555	68.5042
1468	23.5402	8.3477	68.1121
1470	23.0951	9.78904	67.1159
1472	23.4345	10.9067	65.6587
1474	24.3651	11.6653	63.9696
1476	25.7198	12.0264	62.2538
1478	27.3832	12.0097	60.6072
1480	29.2288	11.6334	59.1378
1482	31.1664	10.9491	57.8844
1484	33.1165	10.0357	56.8478
1486	34.9939	8.95063	56.0554
1488	36.7513	7.72274	55.5259
1490	38.3495	6.40942	55.241
1492	39.7751	5.07066	55.1542
1494	40.9971	3.74696	55.2559
1496	41.9968	2.47591	55.5273
1498	42.7522	1.29147	55.9564
1500	43.2538	0.219781	56.5264
1502	42.9233	0.0775535	56.9991
1504	42.3792	0.0046692	57.6161
1506	41.5785	0.0267292	58.3948
1508	40.4725	0.175125	59.3524
1510	38.995	0.490249	60.5147
1512	37.0507	1.02755	61.9218
1514	34.5543	1.86322	63.5825
1516	31.5063	3.07892	65.4148
1518	27.971	4.75023	67.2788
1520	24.018	6.91669	69.0653
1522	0	3.87362	96.1264
1524	0	2.28748	97.7125
1526	0	1.07902	98.921
1528	0	0.283105	99.7169
1530	0	2.04248e-16	100
1532	0	3.26749e-16	100
1534	0	3.16588e-17	100
1536	0	0.254384	99.7456
1538	0	1.74462e-16	100
1540	0	0.232765	99.7672
1542	0	0.20575	99.7943
1544	0	0.641273	99.3587
1546	0	0.959316	99.0407
1548	0	0.899795	99.1002
1550	0	0.76935	99.2306
1552	0	0.579014	99.421
1554	0	0.322263	99.6777
1556	0	2.50085e-17	100
1558	0	7.65993e-16	100
1560	0	3.36351e-16	100
1562	0	7.15334e-15	100
1564	0	7.16947e-15	100
1566	0	7.18417e-15	100
1568	0	2.35049e-15	100
1570	0	2.69647e-15	100
1572	0	2.69466e-15	100
1574	0	2.28555e-15	100
1576	0	1.378e-15	100
1578	0	0.189003	99.811
1580	0	1.75952	98.2405
1582	0	1.64654	98.3535
1584	0	2.88296	97.117
1586	0	4.13626	95.8637
1588	0	4.64051	95.3595
1590	23.3143	1.26211	75.4236
1592	28.0077	0.544672	71.4476
1594	32.023	0.153804	67.8232
1596	35.1927	0.0100647	64.7972
1598	37.5018	0.0156889	62.4826
1600	39.0556	0.07496	60.8695
1602	40.1044	0.141569	59.754
1604	40.8372	0.220602	58.9422
1606	41.34	0.315578	58.3444
1608	41.6727	0.421696	57.9056
1610	41.8825	0.540076	57.5774
1612	41.9718	0.677673	57.3506
1614	41.9608	0.836626	57.2026
1616	41.8356	1.00805	57.1564
1618	41.565	1.19216	57.2428
1620	41.1272	1.3915	57.4813
1622	39.8375	2.48821	57.6743
1624	38.1184	3.86277	58.0188
1626	35.9293	5.51794	58.5527
1628	33.1789	7.5025	59.3186
1630	29.7845	9.83436	60.3811
1632	25.7058	12.5092	61.7849
1634	20.9727	15.5207	63.5066
1636	15.6345	18.8858	65.4797
1638	9.76685	22.6476	67.5855
1640	3.54014	26.8059	69.654
1642	0	30.4424	69.5576
1644	0	33.0728	66.9272
1646	0	35.6669	64.3331
1648	0	38.2047	61.7953
1650	0	40.671	59.329
1652	0	42.9343	57.0657
1654	0	44.833	55.167
1656	0	46.2681	53.7319
1658	0	47.2577	52.7423
1660	0	47.882	52.118
1662	0	48.1806	51.8194
1664	0	48.132	51.868
1666	0	47.7427	52.2573
1668	0	47.0879	52.9121
1670	0	46.2148	53.7852
1672	0	45.1706	54.8294
1674	0	44.0307	55.9693
1676	0	42.8297	57.1703
1678	0	41.5727	58.4273
1680	0	40.2758	59.7242
1682	0	38.98	61.02
1684	0	37.7472	62.2528
1686	0	36.5957	63.4043
1688	0	35.5389	64.4611
1690	0	34.5823	65.4177
1692	0	33.684	66.316
1694	0	32.9004	67.0996
1696	0	32.2528	67.7472
1698	0	31.7251	68.2749
1700	0	31.2895	68.7105
1702	0	30.8696	69.1304
1704	0	30.4007	69.5993
1706	0	29.8218	70.1782
1708	0	29.0823	70.9177
1710	0	28.1198	71.8802
1712	0	26.9471	73.0529
1714	0	25.5586	74.4414
1716	0	23.8986	76.1014
1718	1.47577	21.6963	76.8279
1720	3.78161	19.2116	77.0068
1722	0	2.91033	97.0897
1724	0	3.03949	96.9605
1726	0	3.75442	96.2456
1728	0	5.00044	94.9996
1730	0	3.7156	96.2844
1732	10.539	14.9992	74.4618
1734	8.0578	16.995	74.9472
1736	4.84678	19.5392	75.614
1738	1.43854	22.6822	75.8793
1740	0	25.4925	74.5075
1742	0	27.9163	72.0837
1744	0	30.3217	69.6783
1746	0	32.4065	67.5935
1748	0	34.008	65.992
1750	0	35.1422	64.8578
1752	0	35.7426	64.2574
1754	0	35.7663	64.2337
1756	0	35.2392	64.7608
1758	0	34.1569	65.8431
1760	0	32.5055	67.4945
1762	0	30.3439	69.6561
1764	0	27.8202	72.1798
1766	0	25.121	74.879
1768	0.501302	22.2861	77.2126
1770	2.63858	19.2313	78.1301
1772	4.43999	16.4808	79.0792
1774	0	19.0293	80.9707
1776	0	18.1537	81.8463
1778	0	17.1209	82.8791
1780	0	15.9632	84.0368
1782	0	14.7113	85.2887
1784	0	13.3544	86.6456
1786	0	11.9286	88.0714
1788	0	10.4906	89.5094
1790	0	9.03774	90.9623
1792	0	7.60545	92.3945
1794	0	6.57657	93.4234
1796	0	5.2252	94.7748
1798	0	7.41365	92.5863
1800	0	7.65021	92.3498
1802	0	7.4222	92.5778
1804	0	6.91112	93.0889
1806	0	6.32854	93.6715
1808	0	5.53325e-16	100
1810	0	3.95377e-16	100
1812	0	2.07748e-16	100
1814	0	0.0126878	99.9873
1816	0	0.103175	99.8968
1818	3.5247	1.6343	94.841
1820	5.35779	1.47158	93.1706
1822	6.99247	1.54128	91.4663
1824	8.46775	1.87267	89.6596
1826	9.79321	2.45341	87.7534
1828	10.853	3.35705	85.7899
1830	11.5943	4.5196	83.8861
1832	12.0009	5.85644	82.1426
1834	12.1181	7.26061	80.6213
1836	11.9564	8.61808	79.4255
1838	11.4491	9.88957	78.6614
1840	10.6432	10.9886	78.3682
1842	9.6931	11.7033	78.6036
1844	8.77769	11.8353	79.387
1846	8.09994	11.2461	80.654
1848	7.5436	10.7183	81.7381
1850	0	16.8546	83.1454
1852	0	17.0208	82.9792
1854	0	16.4459	83.5541
1856	0	15.9986	84.0014
1858	0	16.6918	83.3082
1860	0	16.0184	83.9816
1862	0	15.3678	84.6322
1864	0	14.7415	85.2585
1866	0	14.1405	85.8595
1868	0	13.5678	86.4322
1870	0	13.0363	86.9637
1872	0	12.5522	87.4478
1874	0	12.1159	87.8841
1876	0	11.73	88.27
1878	0	7.68363	92.3164
1880	0	7.18595	92.814
1882	0	6.70316	93.2968
1884	0	6.23523	93.7648
1886	0	5.78218	94.2178
1888	0	5.34221	94.6578
1890	0	4.91167	95.0883
1892	0	4.4852	95.5148
1894	0	4.05768	95.9423
1896	0	3.62797	96.372
1898	0	9.82978	90.1702
1900	0	2.4464	97.5536
1902	0	2.18085	97.8192
1904	5.87874	0.0920794	94.0292
1906	5.41547	0.0308137	94.5537
1908	4.90856	0.00134362	95.0901
1910	0	0.848641	99.1514
1912	0	0.823209	99.1768
1914	0	0.187979	99.812
1916	0	5.50942e-16	100
1918	0	8.72218e-16	100
1920	0	1.3774e-16	100
1922	0	1.84538e-15	100
1924	0	0.376358	99.6236
1926	8.21826	0.068749	91.713
1928	12.2203	4.60983	83.1698
1930	18.3125	8.83006	72.8574
1932	28.0526	11.7682	60.1793
1934	40.3696	12.8372	46.7932
1936	50.0483	11.677	38.2747
1938	52.3502	8.70012	38.9496
1940	48.3554	5.80409	45.8405
1942	41.9421	3.8847	54.1732
1944	35.6927	2.72194	61.5854
1946	30.5447	0.467903	68.9874
1948	25.8023	4.38346	69.8142
1950	22.4327	4.90676	72.6606
1952	19.5963	5.5927	74.811
1954	17.1297	6.45745	76.4128
1956	14.9065	7.51963	77.5738
1958	12.8485	8.75424	78.3972
1960	10.8955	10.1551	78.9494
1962	0	12.5209	87.4791
1964	8.36646	2.09974	89.5338
1966	7.29382	3.88559	88.8206
1968	5.86119	5.06102	89.0778
1970	0	6.80609	93.1939
1972	0	6.47336	93.5266
1974	0	6.13737	93.8626
1976	0	5.79575	94.2043
1978	0	5.44753	94.5525
1980	0	5.08751	94.9125
1982	0	4.71636	95.2836
1984	0	4.34039	95.6596
1986	0	3.96009	96.0399
1988	0	3.57844	96.4216
1990	0	3.20443	96.7956
1992	0	2.84578	97.1542
1994	0	2.50493	97.4951
1996	0	2.18624	97.8138
1998	0	1.89343	98.1066
2000	0	1.63446	98.3655
2002	0	1.421	98.579
2004	0	1.24939	98.7506
2006	0	5.88774	94.1123
2008	0	6.28561	93.7144
2010	7.06363	0.345359	92.591
2012	8.74901	0.171077	91.0799
2014	10.2876	0.0727876	89.6396
2016	11.6996	0.0217522	88.2787
2018	12.9657	0.00182062	87.0324
2020	13.2392	0.278489	86.4824
2022	14.7267	0.111347	85.1619
2024	16.1294	0.0121967	83.8584
2026	17.3499	0.0212864	82.6288
2028	18.4371	0.188145	81.3748
2030	19.1635	0.562794	80.2737
2032	19.4565	1.20601	79.3375
2034	19.2431	2.1605	78.5964
2036	18.366	3.47587	78.1581
2038	25.8648	0.196797	73.9384
2040	27.7163	0.0685474	72.2152
2042	29.2928	0.0192176	70.688
2044	30.7268	0.00132913	69.2719
2046	32.049	0.00289481	67.9481
2048	33.2602	0.0183198	66.7215
2050	34.3699	0.044246	65.5858
2052	35.4009	0.0778547	64.5213
2054	36.3499	0.116384	63.5337
2056	37.2115	0.157322	62.6312
2058	37.9953	0.196278	61.8084
2060	38.7163	0.230722	61.053
2062	39.3709	0.257139	60.372
2064	39.9769	0.272814	59.7503
2066	40.2432	0.714145	59.0426
2068	40.4078	1.24446	58.3477
2070	40.4968	1.80089	57.7023
2072	40.5064	2.37865	57.115
2074	40.4439	2.99359	56.5625
2076	40.3042	3.61218	56.0836
2078	40.0679	4.21554	55.7166
2080	39.7298	4.81658	55.4536
2082	39.3413	5.38413	55.2746
2084	38.9253	5.89769	55.177
2086	38.4923	6.30572	55.202
2088	38.1079	6.49503	55.3971
2090	37.8309	6.36155	55.8076
2092	37.7081	5.64543	56.6464
2094	37.7044	3.90532	58.3902
2096	37.6033	1.56798	60.8288
2098	37.375	0.848357	61.7767
2100	37.2338	1.32916	61.437
2102	37.2113	2.58459	60.2042
2104	36.9958	4.43141	58.5728
2106	36.2257	6.56258	57.2118
2108	35.0568	8.60119	56.3421
2110	33.8075	10.3587	55.8338
2112	32.5831	11.8096	55.6073
2114	31.451	13.0002	55.5489
2116	30.5032	13.9974	55.4993
2118	29.7769	14.8263	55.3968
2120	29.2484	15.4682	55.2834
2122	28.8724	15.9891	55.1385
2124	28.641	16.4347	54.9244
2126	28.5909	16.7595	54.6496
2128	28.6929	16.9723	54.3348
2130	28.8984	17.1147	53.9869
2132	29.1754	17.1832	53.6415
2134	29.5202	17.1803	53.2995
2136	29.9193	17.1275	52.9532
2138	30.3518	17.0239	52.6243
2140	30.8208	16.8525	52.3266
2142	31.2986	16.5989	52.1024
2144	31.7937	16.2572	51.9491
2146	32.3166	15.8302	51.8532
2148	32.8248	15.3174	51.8578
2150	33.3179	14.7312	51.9509
2152	33.8238	14.0289	52.1473
2154	34.3189	13.2202	52.4609
2156	34.7825	12.3192	52.8983
2158	35.2114	11.2609	53.5277
2160	35.5727	10.0534	54.3739
2162	35.8351	8.7002	55.4647
2164	35.9596	7.16548	56.8749
2166	35.8795	5.44253	58.678
2168	35.5345	3.51813	60.9474
2170	34.6471	1.65326	63.6996
2172	27.5583	5.0706	67.3711
2174	29.4059	2.96904	67.625
2176	29.9906	1.67237	68.337
2178	31.4836	2.26811	66.2483
2180	32.5177	1.92902	65.5533
2182	32.7858	2.64749	64.5668
2184	32.4447	4.25134	63.304
2186	32.1464	5.80264	62.051
2188	31.8809	7.23826	60.8809
2190	31.6592	8.56515	59.7757
2192	31.5129	9.81062	58.6765
2194	31.4652	10.9365	57.5982
2196	31.4953	11.9639	56.5408
2198	31.5758	12.8871	55.5371
2200	31.7111	13.7134	54.5755
2202	31.8204	14.4226	53.7571
2204	31.8844	14.9446	53.171
2206	31.863	15.2614	52.8756
2208	31.4819	15.4472	53.0709
2210	30.5758	15.7135	53.7106
2212	29.2641	16.1793	54.5566
2214	27.7447	16.8776	55.3777
2216	26.1355	17.7705	56.0941
2218	24.619	18.6366	56.7444
2220	23.3448	19.2258	57.4293
2222	22.3704	19.3506	58.279
2224	21.7427	18.9175	59.3398
2226	21.4811	17.9185	60.6004
2228	21.5448	16.4331	62.0221
2230	21.8685	14.556	63.5755
2232	22.4089	12.3777	65.2134
2234	23.0595	10.0267	66.9139
2236	23.7181	7.50873	68.7732
2238	24.3147	4.79112	70.8942
2240	24.7413	1.60477	73.6539
2242	21.0139	1.66143	77.3247
2244	21.9942	0.522429	77.4834
2246	20.2647	2.42336	77.3119
2248	0	2.51253	97.4875
2250	0	3.19446	96.8055
2252	21.4959	2.13614	76.3679
2254	23.1343	1.42807	75.4376
2256	24.1477	1.155	74.6973
2258	25.0491	1.00098	73.9499
2260	25.9821	0.903992	73.1139
2262	27.0111	0.850425	72.1385
2264	28.1889	0.829004	70.9821
2266	29.5906	0.816743	69.5926
2268	31.2183	0.81625	67.9654
2270	33.0086	0.829173	66.1623
2272	34.8995	0.854753	64.2457
2274	36.5772	1.26578	62.157
2276	38.3184	1.65314	60.0284
2278	40.018	2.07932	57.9027
2280	41.5434	2.52275	55.9339
2282	42.944	2.97451	54.0815
2284	44.2254	3.48549	52.2891
2286	45.3427	4.15172	50.5056
2288	46.1976	5.11512	48.6872
2290	46.6522	6.34536	47.0024
2292	46.6825	7.75319	45.5643
2294	46.3499	9.1532	44.4969
2296	45.7763	10.3969	43.8268
2298	45.1257	11.3995	43.4748
2300	44.5239	12.1277	43.3484
2302	44.0487	12.5792	43.3722
2304	43.7064	12.8399	43.4537
2306	43.4263	13.0552	43.5185
2308	43.2277	13.1991	43.5732
2310	43.1539	13.2527	43.5934
2312	43.0863	13.2953	43.6184
2314	42.9869	13.3012	43.7118
2316	42.83	13.2667	43.9034
2318	42.5629	13.1957	44.2414
2320	42.1272	13.1157	44.757
2322	41.4091	13.0312	45.5597
2324	40.3323	12.8888	46.7789
2326	38.7834	12.6923	48.5243
2328	36.8225	12.383	50.7945
2330	34.4908	11.8927	53.6165
2332	31.6539	11.1752	57.171
2334	28.4279	10.1219	61.4503
2336	25.2968	8.79121	65.912
2338	22.2772	7.22432	70.4985
2340	19.5744	5.45113	74.9745
2342	17.5432	3.7355	78.7213
2344	16.1046	2.47493	81.4205
2346	15.3025	1.74065	82.9569
2348	15.1501	1.37583	83.4741
2350	15.3753	1.26985	83.3549
2352	15.6685	1.24725	83.0843
2354	15.6826	1.36355	82.9538
2356	15.3424	1.36034	83.2972
2358	14.6433	1.3088	84.0479
2360	13.6909	1.20278	85.1063
2362	12.5481	1.05981	86.3921
2364	11.3068	0.940222	87.753
2366	9.99268	0.864209	89.1431
2368	8.67846	0.821975	90.4996
2370	7.52459	0.736104	91.7393
2372	0	9.29959e-16	100
2374	0	1.18317e-15	100
2376	0	3.9435e-16	100
2378	0	1.10854e-15	100
2380	0	3.01703e-16	100
2382	6.01698	0.501939	93.4811
2384	7.16824	0.143607	92.6881
2386	7.68847	0.851511	91.46
2388	8.20685	1.7552	90.0379
2390	9.00628	2.38509	88.6086
2392	10.057	2.9008	87.0422
2394	11.3526	3.30953	85.3379
2396	12.8956	3.59007	83.5143
2398	14.6641	3.81895	81.5169
2400	16.6668	3.9447	79.3885
2402	18.8033	4.00104	77.1956
2404	21.0481	4.03494	74.917
2406	23.3272	4.03021	72.6426
2408	25.554	3.94775	70.4982
2410	27.7788	3.80508	68.4161
2412	29.918	3.62801	66.454
2414	31.9513	3.40059	64.6481
2416	33.8699	3.19157	62.9385
2418	35.6762	2.94931	61.3745
2420	37.3705	2.66772	59.9618
2422	38.9194	2.41752	58.6631
2424	40.3029	2.1637	57.5334
2426	41.5017	1.92975	56.5685
2428	42.547	1.6515	55.8015
2430	43.4505	1.3781	55.1714
2432	44.2053	1.1452	54.6495
2434	44.8462	0.928464	54.2253
2436	45.4179	0.703761	53.8784
2438	45.9046	0.488036	53.6073
2440	46.2833	0.305806	53.4109
2442	46.5539	0.154019	53.2921
2444	46.7285	0.0208364	53.2507
2446	46.7607	0.0156305	53.2237
2448	46.8086	0.0136117	53.1778
2450	46.8458	0.0115698	53.1427
2452	46.9109	0.0093515	53.0797
2454	46.9905	0.00856748	53.0009
2456	47.0855	0.00835799	52.9061
2458	47.2099	0.00868106	52.7815
2460	47.3191	0.0115166	52.6694
2462	47.395	0.0164032	52.5886
2464	47.4174	0.0250787	52.5576
2466	47.4224	0.0354691	52.5421
2468	47.4066	0.0474788	52.5459
2470	47.3664	0.0609561	52.5726
2472	47.2989	0.0757171	52.6254
2474	47.2042	0.0915133	52.7042
2476	47.078	0.108092	52.8139
2478	46.9173	0.125147	52.9576
2480	46.7192	0.142346	53.1384
2482	46.4809	0.15933	53.3598
2484	46.1995	0.175731	53.6248
2486	45.8721	0.191179	53.9367
2488	45.4962	0.205315	54.2984
2490	45.0695	0.2178	54.7127
2492	44.5898	0.228312	55.1818
2494	44.0543	0.237081	55.7087
2496	43.461	0.243676	56.2953
2498	42.806	0.248579	56.9454

## Sheet: Poplar_Wood
lambda_nm	lambda_cm-1	Sigma2_G	Sigma2_GE	Sigma2_e
2500	4000	8.6063	5.65317e-05	91.3936
2498.75	4002	8.37755	0.00102925	91.6214
2497.5	4004	0	4.5047	95.4953
2496.26	4006	8.23182	7.45089e-05	91.7681
2495.01	4008	8.45749	0.0102262	91.5323
2493.77	4010	8.94367	0.115235	90.9411
2492.52	4012	8.7139	2.66903	88.6171
2491.28	4014	8.98151	1.89145	89.127
2490.04	4016	9.26336	1.92551	88.8111
2488.8	4018	9.45321	2.27574	88.2711
2487.56	4020	10.0903	3.65058	86.2591
2486.33	4022	9.9133	8.09716	81.9895
2485.09	4024	9.93935	12.0223	78.0383
2483.85	4026	10.0952	15.4286	74.4763
2482.62	4028	10.326	18.2106	71.4634
2481.39	4030	10.5889	20.3423	69.0687
2480.16	4032	10.8549	21.8709	67.2742
2478.93	4034	11.1069	22.886	66.0071
2477.7	4036	11.3356	23.485	65.1794
2476.47	4038	11.4754	23.4536	65.071
2475.25	4040	11.4826	23.552	64.9655
2474.02	4042	11.4681	23.5948	64.9371
2472.8	4044	11.4804	23.4746	65.045
2471.58	4046	11.4145	23.2776	65.3079
2470.36	4048	11.2522	23.0142	65.7337
2469.14	4050	11.1095	22.5468	66.3437
2467.92	4052	11.0408	21.8762	67.083
2466.7	4054	10.9384	21.213	67.8485
2465.48	4056	10.7394	20.7121	68.5486
2464.27	4058	10.533	20.2966	69.1704
2463.05	4060	10.4183	19.8693	69.7123
2461.84	4062	10.3497	19.5063	70.144
2460.63	4064	10.2666	19.2973	70.4361
2459.42	4066	10.2265	19.1243	70.6492
2458.21	4068	10.3002	18.8232	70.8766
2457	4070	10.412	18.4589	71.1292
2455.8	4072	10.439	18.2309	71.33
2454.59	4074	10.4034	18.1571	71.4394
2453.39	4076	10.4253	18.0729	71.5018
2452.18	4078	10.5245	17.9517	71.5238
2450.98	4080	10.6127	17.9607	71.4266
2449.78	4082	10.6806	18.1301	71.1892
2448.58	4084	10.8206	18.2357	70.9436
2447.38	4086	11.0495	18.1802	70.7703
2446.18	4088	11.2486	18.1667	70.5847
2444.99	4090	11.3622	18.3321	70.3057
2443.79	4092	11.4693	18.5187	70.0119
2442.6	4094	11.6034	18.618	69.7786
2441.41	4096	11.6392	18.8385	69.5223
2440.21	4098	11.4905	19.3697	69.1398
2439.02	4100	11.256	20.0106	68.7334
2437.84	4102	11.0572	20.4844	68.4585
2436.65	4104	10.8347	20.8666	68.2987
2435.46	4106	10.4853	21.364	68.1507
2434.27	4108	10.0704	21.8564	68.0732
2433.09	4110	9.72122	22.1023	68.1765
2431.91	4112	9.3989	22.2042	68.3969
2430.72	4114	8.96862	22.4624	68.5689
2429.54	4116	8.4429	22.834	68.7231
2428.36	4118	7.96107	22.9945	69.0444
2427.18	4120	7.54803	22.9022	69.5498
2426.01	4122	7.10382	22.8313	70.0649
2424.83	4124	6.64016	22.7978	70.5621
2423.65	4126	6.29194	22.4782	71.2299
2422.48	4128	6.07724	21.7678	72.1549
2421.31	4130	5.84897	20.9396	73.2115
2420.14	4132	5.5578	20.1483	74.2939
2418.96	4134	5.32049	19.1532	75.5263
2417.79	4136	5.19092	17.7619	77.0472
2416.63	4138	5.07498	16.0796	78.8455
2415.46	4140	4.94291	14.1457	80.9114
2414.29	4142	4.86433	11.7756	83.3601
2413.13	4144	4.84969	8.99683	86.1535
2411.96	4146	4.86028	6.11238	89.0273
2410.8	4148	4.96094	3.2732	91.7659
2409.64	4150	5.19878	0.0240024	94.7772
2408.48	4152	4.53848	0.0171231	95.4444
2407.32	4154	4.59626	0.0596557	95.3441
2406.16	4156	4.9225	0.00811906	95.0694
2405	4158	0	2.17641	97.8236
2403.85	4160	0	3.2665	96.7335
2402.69	4162	0	5.05026	94.9497
2401.54	4164	9.89128	0.0903472	90.0184
2400.38	4166	0	8.77542	91.2246
2399.23	4168	0	9.75616	90.2438
2398.08	4170	10.5803	0.090091	89.3296
2396.93	4172	0	11.2095	88.7905
2395.78	4174	0	10.9297	89.0703
2394.64	4176	0	11.0571	88.9429
2393.49	4178	0	12.2182	87.7818
2392.34	4180	9.55962	9.68479	80.7556
2391.2	4182	11.4778	0.124725	88.3974
2390.06	4184	11.4794	0.124197	88.3964
2388.92	4186	8.42001	0.0478613	91.5321
2387.77	4188	8.79434	0.135723	91.0699
2386.63	4190	0	8.39364	91.6064
2385.5	4192	10.0588	0.601369	89.3399
2384.36	4194	11.0047	1.27296	87.7223
2383.22	4196	11.2623	0.861178	87.8765
2382.09	4198	12.2516	0.577584	87.1708
2380.95	4200	13.1247	0.456055	86.4192
2379.82	4202	14.1548	1.06151	84.7836
2378.69	4204	14.8394	0.51853	84.6421
2377.56	4206	15.2167	0.195769	84.5876
2376.43	4208	15.3315	0.0323081	84.6362
2375.3	4210	15.0647	0.00245632	84.9328
2374.17	4212	14.4954	0.0617537	85.4429
2373.04	4214	13.7747	0.205572	86.0197
2371.92	4216	13.0246	0.460166	86.5152
2370.79	4218	14.7694	0.0678024	85.1628
2369.67	4220	14.1499	0.633764	85.2163
2368.55	4222	13.3907	1.11907	85.4902
2367.42	4224	12.719	1.34969	85.9313
2366.3	4226	12.0591	1.34048	86.6004
2365.18	4228	11.3223	1.12222	87.5554
2364.07	4230	10.5857	0.693256	88.721
2362.95	4232	9.93841	0.0782249	89.9834
2361.83	4234	8.74256	0.215637	91.0418
2360.72	4236	7.63036	0.417048	91.9526
2359.6	4238	6.4854	0.707581	92.807
2358.49	4240	6.7483	0.39376	92.8579
2357.38	4242	6.72203	0.273796	93.0042
2356.27	4244	7.01789	0.115987	92.8661
2355.16	4246	7.63318	0.0170031	92.3498
2354.05	4248	9.4478	0.352626	90.1996
2352.94	4250	10.6025	0.612447	88.785
2351.83	4252	11.7967	0.93808	87.2652
2350.73	4254	12.9137	1.32584	85.7604
2349.62	4256	13.9976	1.71847	84.2839
2348.52	4258	15.0758	2.055	82.8692
2347.42	4260	16.1129	2.31651	81.5706
2346.32	4262	17.1096	2.51942	80.3709
2345.22	4264	18.2015	2.73135	79.0671
2344.12	4266	19.2576	3.09485	77.6475
2343.02	4268	20.1677	3.88447	75.9478
2341.92	4270	21.1573	4.50271	74.34
2340.82	4272	22.2258	5.04352	72.7307
2339.73	4274	23.335	5.51291	71.1521
2338.63	4276	24.3312	5.93674	69.7321
2337.54	4278	25.0229	6.36199	68.6151
2336.45	4280	25.2938	6.81031	67.8959
2335.36	4282	25.1703	7.27042	67.5592
2334.27	4284	24.7851	7.72952	67.4853
2333.18	4286	24.3713	8.10666	67.522
2332.09	4288	24.144	8.32358	67.5324
2331	4290	23.957	8.89629	67.1467
2329.92	4292	23.6292	10.6567	65.7142
2328.83	4294	22.946	13.0831	63.9709
2327.75	4296	21.8748	15.0342	63.091
2326.66	4298	20.7222	16.4811	62.7967
2325.58	4300	19.6786	17.674	62.6473
2324.5	4302	18.7912	18.575	62.6338
2323.42	4304	18.0701	19.1462	62.7837
2322.34	4306	17.5012	19.519	62.9798
2321.26	4308	17.0637	19.8161	63.1202
2320.19	4310	16.7189	20.0239	63.2572
2319.11	4312	16.4408	20.1171	63.4421
2318.03	4314	16.2202	20.1625	63.6173
2316.96	4316	16.0663	20.216	63.7177
2315.89	4318	15.9928	20.2124	63.7948
2314.81	4320	16.0281	20.0495	63.9224
2313.74	4322	16.2245	19.6994	64.0761
2312.67	4324	16.6689	19.1554	64.1757
2311.6	4326	17.4748	18.3473	64.1779
2310.54	4328	18.7835	17.1985	64.018
2309.47	4330	20.7892	15.6982	63.5127
2308.4	4332	23.7199	13.856	62.4242
2307.34	4334	27.7862	11.6134	60.6004
2306.27	4336	33.0506	8.97135	57.9781
2305.21	4338	39.236	6.30869	54.4554
2304.15	4340	45.4892	4.47359	50.0372
2303.09	4342	50.461	3.77816	45.7609
2302.03	4344	53.0791	1.39592	45.5249
2300.97	4346	53.0724	0.623786	46.3038
2299.91	4348	50.9602	0.785622	48.2541
2298.85	4350	48.092	1.05142	50.8566
2297.79	4352	45.0289	1.43574	53.5354
2296.74	4354	41.7279	2.47346	55.7986
2295.68	4356	38.4611	3.87758	57.6613
2294.63	4358	35.565	5.1175	59.3175
2293.58	4360	33.0819	6.17288	60.7452
2292.53	4362	29.7996	14.0601	56.1403
2291.48	4364	28.2297	14.3149	57.4555
2290.43	4366	26.9522	14.4863	58.5615
2289.38	4368	25.9066	14.5905	59.5029
2288.33	4370	25.0478	14.6278	60.3244
2287.28	4372	24.3364	14.6255	61.038
2286.24	4374	23.7337	14.6272	61.6391
2285.19	4376	23.2127	14.6488	62.1385
2284.15	4378	22.7614	14.6745	62.5641
2283.11	4380	22.3697	14.6948	62.9355
2282.06	4382	22.0191	14.7259	63.255
2281.02	4384	21.6915	14.7839	63.5246
2279.98	4386	21.3806	14.8624	63.757
2278.94	4388	21.0858	14.9454	63.9689
2277.9	4390	20.7969	15.0302	64.1729
2276.87	4392	20.4964	15.12	64.3837
2275.83	4394	20.1811	15.1981	64.6208
2274.8	4396	19.8626	15.2337	64.9037
2273.76	4398	19.7747	13.6287	66.5966
2272.73	4400	19.3778	13.7663	66.8559
2271.69	4402	18.9385	13.8036	67.2579
2270.66	4404	18.4707	13.7149	67.8144
2269.63	4406	17.9945	13.4456	68.5599
2268.6	4408	17.509	12.8808	69.6102
2267.57	4410	17.0186	11.8871	71.0943
2266.55	4412	11.8609	16.9026	71.2365
2265.52	4414	15.5066	9.54683	74.9466
2264.49	4416	16.3324	4.25983	79.4078
2263.47	4418	15.635	1.33395	83.031
2262.44	4420	14.1848	0.140517	85.6746
2261.42	4422	15.0582	1.59984	83.3419
2260.4	4424	14.556	2.26465	83.1793
2259.38	4426	14.042	2.70758	83.2505
2258.36	4428	13.6103	3.40913	82.9806
2257.34	4430	13.2238	4.05455	82.7216
2256.32	4432	12.9021	4.83869	82.2592
2255.3	4434	12.6543	5.41777	81.928
2254.28	4436	12.4026	6.39705	81.2003
2253.27	4438	12.3825	6.22465	81.3928
2252.25	4440	12.29	6.55664	81.1534
2251.24	4442	12.2395	6.88552	80.8749
2250.23	4444	12.2296	7.21845	80.552
2249.21	4446	12.2586	7.51097	80.2305
2248.2	4448	12.2677	8.39324	79.3391
2247.19	4450	12.4091	8.66994	78.921
2246.18	4452	12.5826	8.87816	78.5393
2245.17	4454	12.766	9.1061	78.1279
2244.17	4456	12.9676	9.29035	77.7421
2243.16	4458	13.1826	9.43569	77.3817
2242.15	4460	13.3991	9.59218	77.0087
2241.15	4462	13.6292	9.71248	76.6583
2240.14	4464	13.8803	9.84661	76.2731
2239.14	4466	14.1722	9.9511	75.8767
2238.14	4468	14.5019	10.0721	75.4261
2237.14	4470	14.8699	10.1908	74.9393
2236.14	4472	15.2746	10.2936	74.4318
2235.14	4474	15.7115	10.372	73.9166
2234.14	4476	16.1707	10.4409	73.3884
2233.14	4478	16.6462	10.5117	72.8421
2232.14	4480	17.1382	10.5803	72.2815
2231.15	4482	17.6465	10.6352	71.7183
2230.15	4484	18.163	10.6841	71.1529
2229.16	4486	18.6788	10.7365	70.5847
2228.16	4488	19.1893	10.7828	70.028
2227.17	4490	19.9229	9.07998	70.9971
2226.18	4492	19.8667	13.0739	67.0594
2225.19	4494	20.3125	13.2377	66.4498
2224.2	4496	20.7485	13.3866	65.8649
2223.21	4498	21.1688	13.5564	65.2747
2222.22	4500	21.565	13.7459	64.6891
2221.24	4502	21.9351	13.9054	64.1595
2220.25	4504	22.2798	14.0183	63.7019
2219.26	4506	22.5908	14.1314	63.2778
2218.28	4508	22.8631	14.2691	62.8678
2217.29	4510	23.1021	14.3891	62.5087
2216.31	4512	23.3083	14.4713	62.2204
2215.33	4514	23.4527	14.5672	61.9802
2214.35	4516	23.503	14.7124	61.7846
2213.37	4518	23.4532	14.8512	61.6956
2212.39	4520	23.3211	14.9177	61.7612
2211.41	4522	23.1078	14.9388	61.9534
2210.43	4524	22.8111	14.9744	62.2144
2209.46	4526	22.458	15.0117	62.5303
2208.48	4528	22.1007	15.0037	62.8956
2207.51	4530	21.7608	14.9584	63.2808
2206.53	4532	21.4311	14.9119	63.657
2205.56	4534	21.1186	14.8584	64.023
2204.59	4536	21.6065	9.82189	68.5716
2203.61	4538	21.2901	10.1908	68.5191
2202.64	4540	20.987	10.4306	68.5824
2201.67	4542	20.6809	10.5415	68.7776
2200.7	4544	20.072	12.5751	67.3529
2199.74	4546	19.8345	12.652	67.5134
2198.77	4548	19.6379	12.7367	67.6254
2197.8	4550	19.4569	12.8765	67.6666
2196.84	4552	19.3213	13.0541	67.6246
2195.87	4554	19.2836	13.2006	67.5158
2194.91	4556	19.3201	13.3539	67.326
2193.94	4558	19.4035	13.5053	67.0911
2192.98	4560	19.5428	13.6675	66.7897
2192.02	4562	19.7679	13.8058	66.4263
2191.06	4564	20.0297	13.9406	66.0297
2190.1	4566	20.2749	14.0509	65.6742
2189.14	4568	20.5183	14.1662	65.3155
2188.18	4570	20.8191	14.35	64.8309
2187.23	4572	21.161	14.6267	64.2122
2186.27	4574	21.4714	15.0079	63.5207
2185.31	4576	21.7469	15.4835	62.7695
2184.36	4578	22.0529	16.0331	61.914
2183.41	4580	22.3823	16.6245	60.9932
2182.45	4582	22.6307	17.204	60.1653
2181.5	4584	22.7538	17.7511	59.4951
2180.55	4586	22.8272	18.2747	58.8981
2179.6	4588	22.9067	18.7682	58.3251
2178.65	4590	22.9157	19.2005	57.8838
2177.7	4592	22.8031	19.6055	57.5914
2176.75	4594	22.616	19.993	57.391
2175.81	4596	22.405	20.3001	57.2949
2174.86	4598	22.1043	20.4537	57.442
2173.91	4600	21.6843	20.4744	57.8413
2172.97	4602	21.2286	20.3629	58.4084
2172.02	4604	20.8407	20.1214	59.0378
2171.08	4606	20.4968	19.8483	59.6549
2170.14	4608	20.1309	19.7075	60.1616
2169.2	4610	19.7245	19.6624	60.6131
2168.26	4612	19.2921	19.5585	61.1493
2167.32	4614	18.8105	19.3743	61.8152
2166.38	4616	18.2512	19.2095	62.5393
2165.44	4618	17.655	19.0116	63.3334
2164.5	4620	17.0904	18.6212	64.2883
2163.57	4622	16.5513	18.0279	65.4208
2162.63	4624	15.9762	17.3859	66.6379
2161.69	4626	15.3744	16.7307	67.8949
2160.76	4628	14.8205	15.9079	69.2717
2159.83	4630	14.363	14.8824	70.7546
2158.89	4632	13.9613	13.8512	72.1875
2157.96	4634	13.581	12.9659	73.4532
2157.03	4636	13.2462	12.1163	74.6375
2156.1	4638	13.0048	11.1622	75.8331
2155.17	4640	12.8522	10.1858	76.9621
2154.24	4642	12.7656	9.3258	77.9087
2153.32	4644	12.7436	8.56067	78.6957
2152.39	4646	12.7893	7.84296	79.3677
2151.46	4648	12.8732	7.27875	79.848
2150.54	4650	12.9674	6.9663	80.0663
2149.61	4652	13.0735	6.79508	80.1314
2148.69	4654	13.206	6.60106	80.1929
2147.77	4656	13.3684	6.40395	80.2277
2146.84	4658	13.5579	6.31535	80.1268
2145.92	4660	13.7806	6.31574	79.9037
2145	4662	14.0353	6.28405	79.6807
2144.08	4664	14.3079	6.21912	79.4729
2143.16	4666	14.582	6.25029	79.1677
2142.25	4668	14.8749	6.41155	78.7135
2141.33	4670	15.2104	6.60534	78.1842
2140.41	4672	15.601	6.77005	77.629
2139.5	4674	16.0285	6.96019	77.0113
2138.58	4676	16.4851	7.21034	76.3045
2137.67	4678	16.9677	7.46398	75.5683
2136.75	4680	17.4819	7.69572	74.8224
2135.84	4682	18.0139	7.97555	74.0105
2134.93	4684	18.5503	8.34096	73.1087
2134.02	4686	19.0635	8.73149	72.205
2133.11	4688	19.5547	9.08021	71.365
2132.2	4690	20.0511	9.39561	70.5532
2131.29	4692	20.5972	9.70804	69.6948
2130.38	4694	21.1918	10.0026	68.8057
2129.47	4696	21.7974	10.2527	67.9499
2128.57	4698	22.3763	10.4627	67.1611
2127.66	4700	22.9244	10.6459	66.4297
2126.75	4702	23.4293	10.7901	65.7806
2125.85	4704	23.8617	10.8667	65.2716
2124.95	4706	24.2119	10.8896	64.8985
2124.04	4708	24.4864	10.9085	64.6051
2123.14	4710	24.6724	10.9439	64.3837
2122.24	4712	24.7319	10.9848	64.2833
2121.34	4714	24.6885	11.0177	64.2938
2120.44	4716	24.6042	11.0397	64.3561
2119.54	4718	24.5282	11.0389	64.4329
2118.64	4720	24.419	10.9881	64.5929
2117.75	4722	24.2474	10.8848	64.8678
2116.85	4724	24.0176	10.7645	65.2179
2115.95	4726	23.7484	10.6746	65.577
2115.06	4728	23.3756	10.6234	66.001
2114.16	4730	22.8792	10.6067	66.5142
2113.27	4732	22.3265	10.6127	67.0608
2112.38	4734	21.8521	10.6261	67.5217
2111.49	4736	21.4735	10.6024	67.9241
2110.6	4738	21.1672	10.4903	68.3425
2109.7	4740	20.9433	10.3068	68.7499
2108.81	4742	20.863	10.1247	69.0123
2107.93	4744	20.8774	9.98148	69.1411
2107.04	4746	20.8724	9.87173	69.2558
2106.15	4748	20.8308	9.843	69.3262
2105.26	4750	20.8761	9.99584	69.1281
2104.38	4752	21.0576	10.3352	68.6073
2103.49	4754	21.2585	10.7345	68.007
2102.61	4756	21.424	11.1063	67.4697
2101.72	4758	21.6762	11.4362	66.8876
2100.84	4760	22.1639	11.7238	66.1123
2099.96	4762	22.7534	11.9371	65.3095
2099.08	4764	23.3289	12.1298	64.5413
2098.2	4766	24.059	12.3396	63.6014
2097.32	4768	25.2427	12.5429	62.2144
2096.44	4770	26.5853	12.7271	60.6875
2095.56	4772	27.6196	12.962	59.4184
2094.68	4774	28.284	13.1466	58.5694
2093.8	4776	28.8848	13.1834	57.9318
2092.93	4778	29.1796	13.0861	57.7343
2092.05	4780	28.8549	13.0037	58.1414
2091.18	4782	28.1232	12.9228	58.9541
2090.3	4784	27.4688	12.654	59.8772
2089.43	4786	26.8689	12.15	60.981
2088.55	4788	26.0621	11.6151	62.3228
2087.68	4790	25.0906	11.1258	63.7836
2086.81	4792	24.2221	10.5422	65.2357
2085.94	4794	23.4552	9.89508	66.6497
2085.07	4796	22.5374	9.43506	68.0275
2084.2	4798	21.4784	9.19182	69.3298
2083.33	4800	20.5555	8.83809	70.6064
2082.47	4802	19.8992	8.14229	71.9585
2081.6	4804	19.3317	7.21286	73.4554
2080.73	4806	18.7364	6.18961	75.074
2079.87	4808	18.1914	5.00953	76.7991
2079	4810	17.755	3.64193	78.6031
2078.14	4812	17.3146	2.1187	80.5667
2077.27	4814	13.3336	1.46275	85.2037
2076.41	4816	13.0965	1.31704	85.5865
2075.55	4818	13.047	1.12607	85.827
2074.69	4820	13.0909	0.913521	85.9956
2073.83	4822	13.1088	0.707363	86.1839
2072.97	4824	13.1369	0.494235	86.3689
2072.11	4826	13.2249	0.272868	86.5023
2071.25	4828	13.3059	0.0961277	86.5979
2070.39	4830	13.3041	0.00998867	86.6859
2069.54	4832	13.1497	0.0109311	86.8394
2068.68	4834	12.9933	0.110859	86.8958
2067.82	4836	12.8085	0.357871	86.8336
2066.97	4838	12.5187	0.777691	86.7036
2066.12	4840	12.1131	1.41935	86.4676
2065.26	4842	11.5693	2.49384	85.9368
2064.41	4844	12.1345	0.104074	87.7614
2063.56	4846	11.7683	1.11919	87.1125
2062.71	4848	11.4297	1.81375	86.7565
2061.86	4850	11.0953	2.37368	86.531
2061.01	4852	10.7734	2.87316	86.3534
2060.16	4854	10.4425	3.33117	86.2264
2059.31	4856	10.0932	3.74298	86.1638
2058.46	4858	9.759	4.08703	86.154
2057.61	4860	9.47665	4.34737	86.176
2056.77	4862	9.23252	4.52943	86.238
2055.92	4864	8.99512	4.65072	86.3542
2055.08	4866	8.7706	4.72664	86.5028
2054.23	4868	8.57915	4.76643	86.6544
2053.39	4870	8.40388	4.78382	86.8123
2052.55	4872	8.21187	4.78832	86.9998
2051.7	4874	8.01423	4.77255	87.2132
2050.86	4876	7.84833	4.71771	87.434
2050.02	4878	7.71227	4.61198	87.6757
2049.18	4880	7.5641	4.45789	87.978
2048.34	4882	7.39465	4.26957	88.3358
2047.5	4884	7.23742	4.0663	88.6963
2046.66	4886	7.10832	3.86347	89.0282
2045.83	4888	6.97962	3.66161	89.3588
2044.99	4890	6.83783	3.45261	89.7096
2044.15	4892	6.71126	3.23212	90.0566
2043.32	4894	6.6208	3.00999	90.3692
2042.48	4896	6.5456	2.77866	90.6757
2041.65	4898	6.44888	2.5562	90.9949
2040.82	4900	6.33604	2.34596	91.318
2039.98	4902	6.22873	2.14247	91.6288
2039.15	4904	6.11568	1.94423	91.9401
2038.32	4906	5.97864	1.74457	92.2768
2037.49	4908	5.83256	1.54678	92.6207
2036.66	4910	5.71231	1.35233	92.9354
2035.83	4912	5.61208	1.18631	93.2016
2035	4914	5.49091	1.07042	93.4387
2034.17	4916	5.24889	0.984584	93.7665
2033.35	4918	5.04688	1.03939	93.9137
2032.52	4920	4.8589	1.09463	94.0465
2031.69	4922	5.12759	0.791168	94.0812
2030.87	4924	4.93923	0.828587	94.2322
2030.04	4926	4.76964	0.860074	94.3703
2029.22	4928	4.63347	0.886466	94.4801
2028.4	4930	4.51869	0.909275	94.572
2027.58	4932	0	4.06534	95.9347
2026.75	4934	0	4.02292	95.9771
2025.93	4936	0	4.0008	95.9992
2025.11	4938	0	3.99126	96.0087
2024.29	4940	0	3.98245	96.0176
2023.47	4942	0	3.97492	96.0251
2022.65	4944	0	3.97695	96.0231
2021.84	4946	0	3.98946	96.0105
2021.02	4948	0	4.0091	95.9909
2020.2	4950	0	4.04085	95.9591
2019.39	4952	0	4.09697	95.903
2018.57	4954	0	4.1793	95.8207
2017.76	4956	0	4.2831	95.7169
2016.94	4958	0	4.41807	95.5819
2016.13	4960	0	4.61476	95.3852
2015.32	4962	0	4.88865	95.1113
2014.5	4964	0	5.21851	94.7815
2013.69	4966	0	5.58287	94.4171
2012.88	4968	0	5.99545	94.0045
2012.07	4970	0	6.45701	93.543
2011.26	4972	0	2.72485	97.2752
2010.45	4974	0	2.64846	97.3515
2009.65	4976	0	2.56221	97.4378
2008.84	4978	0	2.46854	97.5315
2008.03	4980	0	2.36362	97.6364
2007.23	4982	0	2.24424	97.7558
2006.42	4984	0	2.12094	97.8791
2005.62	4986	0	2.01236	97.9876
2004.81	4988	0	1.91659	98.0834
2004.01	4990	0	1.81667	98.1833
2003.21	4992	0	1.70691	98.2931
2002.4	4994	0	1.59936	98.4006
2001.6	4996	0	1.50695	98.4931
2000.8	4998	0	1.42379	98.5762
2000	5000	0	1.34262	98.6574
1999.2	5002	0	1.27496	98.725
1998.4	5004	0	1.2288	98.7712
1997.6	5006	0	1.19654	98.8035
1996.81	5008	0	1.16804	98.832
1996.01	5010	0	1.14828	98.8517
1995.21	5012	0	1.13414	98.8659
1994.42	5014	0.745474	0.51401	98.7405
1993.62	5016	0.713706	0.846452	98.4398
1992.83	5018	0.701179	1.13645	98.1624
1992.03	5020	0.700767	1.41728	97.882
1991.24	5022	0.711549	1.69996	97.5885
1990.45	5024	0.735256	1.97263	97.2921
1989.65	5026	0.775493	2.23075	96.9938
1988.86	5028	0.838362	2.47807	96.6836
1988.07	5030	0.923604	2.71546	96.3609
1987.28	5032	1.02222	2.93353	96.0443
1986.49	5034	1.12346	3.13115	95.7454
1985.7	5036	1.22424	3.32172	95.454
1984.91	5038	1.32637	3.51651	95.1571
1984.13	5040	1.4308	3.71227	94.8569
1983.34	5042	1.53794	3.90355	94.5585
1982.55	5044	1.64849	4.10442	94.2471
1981.77	5046	1.76323	4.33336	93.9034
1980.98	5048	1.88095	4.58724	93.5318
1980.2	5050	2.00205	4.84009	93.1579
1979.41	5052	2.13209	5.07693	92.791
1978.63	5054	2.27735	5.29912	92.4235
1977.85	5056	2.43926	5.50306	92.0577
1977.07	5058	2.61389	5.67137	91.7147
1976.28	5060	2.79512	5.80185	91.403
1975.5	5062	2.97454	5.91157	91.1139
1974.72	5064	3.14145	6.01289	90.8457
1973.94	5066	3.28565	6.10365	90.6107
1973.16	5068	3.40091	6.19341	90.4057
1972.39	5070	3.48811	6.31876	90.1931
1971.61	5072	3.55123	6.495	89.9538
1970.83	5074	3.59651	6.68703	89.7165
1970.06	5076	3.63138	6.84908	89.5195
1969.28	5078	3.66011	6.97754	89.3623
1968.5	5080	3.68083	7.0973	89.2219
1967.73	5082	3.68979	7.20835	89.1019
1966.96	5084	3.68658	7.28966	89.0238
1966.18	5086	3.6716	7.35237	88.976
1965.41	5088	3.63979	7.44096	88.9193
1964.64	5090	3.58293	7.5799	88.8372
1963.86	5092	3.50182	7.74899	88.7492
1963.09	5094	3.40968	7.93255	88.6578
1962.32	5096	3.32659	8.13106	88.5424
1961.55	5098	3.27119	8.33466	88.3941
1960.78	5100	3.25591	8.51191	88.2322
1960.02	5102	3.28509	8.65417	88.0607
1959.25	5104	3.35478	8.78659	87.8586
1958.48	5106	3.45443	8.9286	87.617
1957.71	5108	3.56927	9.07237	87.3584
1956.95	5110	3.69059	9.22217	87.0872
1956.18	5112	3.82751	9.40457	86.7679
1955.42	5114	4.00064	9.63543	86.3639
1954.65	5116	4.22023	9.89384	85.8859
1953.89	5118	4.4714	10.1694	85.3592
1953.12	5120	4.73012	10.4866	84.7833
1952.36	5122	4.98014	10.864	84.1558
1951.6	5124	5.22124	11.2707	83.5081
1950.84	5126	5.4571	11.6637	82.8792
1950.08	5128	5.68988	12.0426	82.2675
1949.32	5130	5.92519	12.438	81.6368
1948.56	5132	6.17672	12.8524	80.9709
1947.8	5134	6.45623	13.2522	80.2915
1947.04	5136	6.75817	13.6163	79.6255
1946.28	5138	7.06049	13.9573	78.9822
1945.53	5140	7.34446	14.2886	78.3669
1944.77	5142	7.60945	14.5988	77.7918
1944.01	5144	7.87261	14.8885	77.2389
1943.26	5146	8.14657	15.1776	76.6759
1942.5	5148	8.43166	15.4698	76.0985
1941.75	5150	8.72458	15.7271	75.5483
1940.99	5152	9.01874	15.9225	75.0588
1940.24	5154	9.30359	16.0748	74.6217
1939.49	5156	9.5697	16.2174	74.2129
1938.74	5158	9.8233	16.3405	73.8362
1937.98	5160	10.0713	16.4194	73.5093
1937.23	5162	10.2995	16.4656	73.235
1936.48	5164	10.4836	16.4891	73.0274
1935.73	5166	10.611	16.4978	72.8911
1934.98	5168	10.7084	16.432	72.8595
1934.24	5170	10.788	16.3131	72.8989
1933.49	5172	10.8412	16.1636	72.9952
1932.74	5174	10.8495	16.0059	73.1445
1931.99	5176	10.8126	15.8375	73.3499
1931.25	5178	10.7458	15.6318	73.6224
1930.5	5180	10.6403	15.4165	73.9432
1929.76	5182	10.474	15.2174	74.3087
1929.01	5184	10.2539	14.954	74.7921
1928.27	5186	9.98462	14.6342	75.3812
1927.53	5188	9.67311	14.263	76.0639
1926.78	5190	9.30587	13.8937	76.8004
1926.04	5192	8.88439	13.4937	77.6219
1925.3	5194	8.41382	13.0511	78.5351
1924.56	5196	7.88649	12.6396	79.4739
1923.82	5198	7.32131	12.2249	80.4538
1923.08	5200	6.72241	11.8472	81.4304
1922.34	5202	6.1239	11.4173	82.4588
1921.6	5204	5.52542	10.9899	83.4847
1920.86	5206	4.9392	10.5414	84.5194
1920.12	5208	4.36394	10.0895	85.5465
1919.39	5210	3.81277	9.59024	86.597
1918.65	5212	3.29377	9.0572	87.649
1917.91	5214	2.8178	8.5144	88.6678
1917.18	5216	2.40032	7.97089	89.6288
1916.44	5218	2.05721	7.40802	90.5348
1915.71	5220	1.79636	6.8246	91.379
1914.98	5222	1.60618	6.25837	92.1354
1914.24	5224	1.47174	5.74273	92.7855
1913.51	5226	1.37261	5.30495	93.3224
1912.78	5228	1.27918	4.98386	93.737
1912.05	5230	1.16943	4.79131	94.0393
1911.31	5232	1.04548	4.701	94.2535
1910.58	5234	0.915634	4.69158	94.3928
1909.85	5236	0.783218	4.75789	94.4589
1909.13	5238	0.653753	4.87996	94.4663
1908.4	5240	0.535162	5.03479	94.4301
1907.67	5242	0.430609	5.22163	94.3478
1906.94	5244	0.335823	5.45686	94.2073
1906.21	5246	0.254312	5.71681	94.0289
1905.49	5248	0.194316	5.96041	93.8453
1904.76	5250	0.160577	6.18144	93.658
1904.04	5252	0.149147	6.40704	93.4438
1903.31	5254	0.158364	6.63626	93.2054
1902.59	5256	0.189955	6.83876	92.9713
1901.86	5258	0.245298	7.00675	92.748
1901.14	5260	0.320563	7.16208	92.5174
1900.42	5262	0.407762	7.31428	92.278
1899.7	5264	0.499098	7.44123	92.0597
1898.97	5266	0.593187	7.53406	91.8728
1898.25	5268	0.693273	7.60957	91.6972
1897.53	5270	0.801205	7.68119	91.5176
1896.81	5272	0.914363	7.73655	91.3491
1896.09	5274	1.03049	7.76601	91.2035
1895.38	5276	1.1501	7.78055	91.0693
1894.66	5278	1.27293	7.79131	90.9358
1893.94	5280	1.39405	7.78531	90.8206
1893.22	5282	1.50977	7.74453	90.7457
1892.51	5284	1.62367	7.66978	90.7066
1891.79	5286	1.74089	7.57247	90.6866
1891.07	5288	1.85658	7.45446	90.689
1890.36	5290	1.95884	7.31603	90.7251
1889.64	5292	2.04458	7.16582	90.7896
1888.93	5294	2.12481	7.01207	90.8631
1888.22	5296	2.20882	6.84839	90.9428
1887.5	5298	2.29226	6.6653	91.0424
1886.79	5300	2.36745	6.4687	91.1638
1886.08	5302	2.43646	6.26944	91.2941
1885.37	5304	2.50541	6.06239	91.4322
1884.66	5306	2.57185	5.83286	91.5953
1883.95	5308	2.62963	5.58422	91.7862
1883.24	5310	2.67877	5.3363	91.9849
1882.53	5312	2.72034	5.1015	92.1782
1881.82	5314	2.7462	4.87487	92.3789
1881.11	5316	2.74722	4.65334	92.5994
1880.41	5318	2.72776	4.44304	92.8292
1879.7	5320	2.70281	4.24579	93.0514
1878.99	5322	2.67448	4.04485	93.2807
1878.29	5324	2.63847	3.82913	93.5324
1877.58	5326	2.59985	3.60866	93.7915
1876.88	5328	2.5694	3.39983	94.0308
1876.17	5330	2.54271	3.19584	94.2615
1875.47	5332	2.50463	2.97899	94.5164
1874.77	5334	2.45636	2.75201	94.7916
1874.06	5336	2.40928	2.53827	95.0525
1873.36	5338	2.35975	2.34855	95.2917
1872.66	5340	2.29216	2.17098	95.5369
1871.96	5342	2.20752	1.99344	95.799
1871.26	5344	2.13784	1.82828	96.0339
1870.56	5346	2.0821	1.72662	96.1913
1869.86	5348	0	3.41273	96.5873
1869.16	5350	0	3.3019	96.6981
1868.46	5352	0	3.19101	96.809
1867.76	5354	0	3.11516	96.8848
1867.06	5356	0	3.04158	96.9584
1866.37	5358	0	2.91808	97.0819
1865.67	5360	0	2.79609	97.2039
1864.98	5362	0	2.71997	97.28
1864.28	5364	1.94654	1.07792	96.9755
1863.59	5366	1.98586	1.04983	96.9643
1862.89	5368	2.01042	1.09459	96.895
1862.2	5370	2.11742	1.1851	96.6975
1861.5	5372	2.31672	1.30233	96.381
1860.81	5374	2.52687	1.42029	96.0528
1860.12	5376	2.72363	1.54413	95.7322
1859.43	5378	3.00652	1.69803	95.2955
1858.74	5380	3.4156	1.86714	94.7173
1858.05	5382	3.84123	2.02437	94.1344
1857.36	5384	4.21221	2.1699	93.6179
1856.67	5386	4.59546	2.32519	93.0793
1855.98	5388	5.02504	2.48413	92.4908
1855.29	5390	5.3958	2.63626	91.9679
1854.6	5392	5.62823	2.77594	91.5958
1853.91	5394	5.82086	2.90114	91.278
1853.22	5396	6.08985	2.99352	90.9166
1852.54	5398	6.35946	3.05265	90.5879
1851.85	5400	6.49735	3.09257	90.4101
1851.17	5402	6.53064	3.12522	90.3441
1850.48	5404	6.573	3.15259	90.2744
1849.8	5406	6.61334	3.16727	90.2194
1849.11	5408	6.55793	3.18036	90.2617
1848.43	5410	6.42984	3.21197	90.3582
1847.75	5412	6.33213	3.27897	90.3889
1847.06	5414	6.2345	3.37574	90.3898
1846.38	5416	6.04368	3.49549	90.4608
1845.7	5418	5.80062	3.59393	90.6054
1845.02	5420	5.62235	3.6357	90.742
1844.34	5422	5.48877	3.64542	90.8658
1843.66	5424	5.26537	3.69143	91.0432
1842.98	5426	4.93682	3.75583	91.3073
1842.3	5428	4.63904	3.75871	91.6023
1841.62	5430	4.43167	3.67325	91.8951
1840.94	5432	4.21631	3.60839	92.1753
1840.26	5434	3.94282	3.63577	92.4214
1839.59	5436	3.696	3.72414	92.5799
1838.91	5438	3.50262	3.83299	92.6644
1838.24	5440	3.19865	4.18922	92.6121
1837.56	5442	2.68743	4.9838	92.3288
1836.88	5444	0	9.90721e-17	100
1836.21	5446	0	1.13956e-16	100
1835.54	5448	0	1.26186e-16	100
1834.86	5450	0	1.64699e-16	100
1834.19	5452	0	1.7153e-16	100
1833.52	5454	0	3.73826e-16	100
1832.84	5456	0	3.21035e-16	100
1832.17	5458	0	9.29987e-17	100
1831.5	5460	0	7.24582e-17	100
1830.83	5462	0.537829	9.12557	90.3366
1830.16	5464	0.246176	10.2689	89.485
1829.49	5466	0.0254818	11.0881	88.8864
1828.82	5468	0	11.8075	88.1925
1828.15	5470	0	12.4116	87.5884
1827.49	5472	0	12.9501	87.0499
1826.82	5474	0	13.4696	86.5304
1826.15	5476	0	13.9538	86.0462
1825.48	5478	0	14.3367	85.6633
1824.82	5480	0	14.6175	85.3825
1824.15	5482	0.0981966	14.8462	85.0556
1823.49	5484	0.263023	15.1355	84.6015
1822.82	5486	0.354833	15.5285	84.1166
1822.16	5488	0.459492	15.9576	83.583
1821.49	5490	0.530747	16.3597	83.1096
1820.83	5492	0.52392	16.7355	82.7405
1820.17	5494	0.440917	17.072	82.4871
1819.51	5496	0.303486	17.3453	82.3512
1818.84	5498	0.0369293	17.5741	82.389
1818.18	5500	0	17.7188	82.2812
1817.52	5502	0	17.7909	82.2091
1816.86	5504	0	17.7552	82.2448
1816.2	5506	0	17.6334	82.3666
1815.54	5508	0	17.518	82.482
1814.88	5510	0	17.4802	82.5198
1814.22	5512	0	17.5317	82.4683
1813.57	5514	0	17.6981	82.3019
1812.91	5516	0	18.0221	81.9779
1812.25	5518	0	18.4664	81.5336
1811.59	5520	0	18.867	81.133
1810.94	5522	0	19.1168	80.8832
1810.28	5524	0	19.2672	80.7328
1809.63	5526	0	19.4081	80.5919
1808.97	5528	0	19.5291	80.4709
1808.32	5530	0	19.6156	80.3844
1807.66	5532	0	19.7227	80.2773
1807.01	5534	0	19.891	80.109
1806.36	5536	0	20.0673	79.9327
1805.71	5538	0	20.166	79.834
1805.05	5540	0	20.2017	79.7983
1804.4	5542	0	20.271	79.729
1803.75	5544	0	20.3954	79.6046
1803.1	5546	0	20.5299	79.4701
1802.45	5548	0	20.7023	79.2977
1801.8	5550	0	20.9567	79.0433
1801.15	5552	0	21.2266	78.7734
1800.5	5554	0	21.3348	78.6652
1799.86	5556	0	21.2037	78.7963
1799.21	5558	0	20.9493	79.0507
1798.56	5560	0.000731081	20.7188	79.2805
1797.91	5562	0.291592	20.473	79.2354
1797.27	5564	0.597665	20.3012	79.1011
1796.62	5566	0.868796	20.3311	78.8002
1795.98	5568	1.04695	20.6193	78.3338
1795.33	5570	1.16243	20.9908	77.8468
1794.69	5572	1.26191	21.2538	77.4843
1794.04	5574	1.30652	21.3966	77.2969
1793.4	5576	1.23782	21.494	77.2682
1792.76	5578	1.10103	21.546	77.353
1792.11	5580	1.03807	21.5618	77.4001
1791.47	5582	1.17431	21.5399	77.2858
1790.83	5584	1.54615	21.4234	77.0305
1790.19	5586	2.1092	21.2004	76.6904
1789.55	5588	2.779	20.9931	76.2279
1788.91	5590	3.4595	20.9205	75.62
1788.27	5592	4.08544	20.976	74.9385
1787.63	5594	4.68615	21.0808	74.233
1786.99	5596	5.36807	21.1912	73.4407
1786.35	5598	6.1805	21.3224	72.4971
1785.71	5600	7.04839	21.4908	71.4608
1785.08	5602	7.85419	21.7352	70.4106
1784.44	5604	8.57216	22.0708	69.3571
1783.8	5606	9.24403	22.4684	68.2876
1783.17	5608	9.89066	22.8207	67.2887
1782.53	5610	10.4937	23.0595	66.4468
1781.9	5612	11.0661	23.1625	65.7714
1781.26	5614	11.6347	23.1633	65.202
1780.63	5616	12.1956	23.0761	64.7283
1779.99	5618	12.7189	22.91	64.3711
1779.36	5620	13.2155	22.6792	64.1053
1778.73	5622	13.741	22.3881	63.8709
1778.09	5624	14.3077	22.0624	63.6299
1777.46	5626	14.867	21.7252	63.4078
1776.83	5628	15.3739	21.4187	63.2074
1776.2	5630	15.8371	21.1764	62.9864
1775.57	5632	16.2524	21.0276	62.72
1774.94	5634	16.5843	20.9625	62.4532
1774.31	5636	16.7885	20.9667	62.2447
1773.68	5638	16.8816	21.0221	62.0963
1773.05	5640	16.895	21.1032	62.0019
1772.42	5642	16.8582	21.1677	61.9742
1771.79	5644	16.7786	21.1995	62.0219
1771.17	5646	16.6984	21.2019	62.0997
1770.54	5648	16.6433	21.1924	62.1643
1769.91	5650	16.6028	21.1761	62.2211
1769.29	5652	16.5131	21.1451	62.3419
1768.66	5654	16.3527	21.0819	62.5653
1768.03	5656	16.1374	20.9899	62.8727
1767.41	5658	15.9139	20.8492	63.237
1766.78	5660	15.6918	20.6348	63.6734
1766.16	5662	15.4805	20.339	64.1805
1765.54	5664	15.2806	19.9909	64.7285
1764.91	5666	15.0914	19.652	65.2565
1764.29	5668	14.8811	19.3302	65.7887
1763.67	5670	14.6544	18.9906	66.355
1763.05	5672	14.4724	18.5958	66.9318
1762.43	5674	14.4073	18.1047	67.488
1761.8	5676	14.4596	17.5099	68.0306
1761.18	5678	14.5741	16.8585	68.5675
1760.56	5680	14.7357	16.1996	69.0647
1759.94	5682	14.9442	15.5714	69.4844
1759.32	5684	15.1887	14.952	69.8592
1758.71	5686	15.4386	14.3015	70.2598
1758.09	5688	15.7285	13.5952	70.6762
1757.47	5690	16.113	12.8099	71.0771
1756.85	5692	16.5877	11.9448	71.4674
1756.23	5694	17.0393	11.0372	71.9235
1755.62	5696	17.4127	10.1086	72.4787
1755	5698	17.7555	9.12576	73.1188
1754.39	5700	18.1198	8.04689	73.8333
1753.77	5702	18.4141	6.88115	74.7048
1753.16	5704	18.5486	5.65056	75.8009
1752.54	5706	18.5673	4.14876	77.2839
1751.93	5708	17.6477	1.11262	81.2396
1751.31	5710	16.6149	3.98106	79.404
1750.7	5712	14.1269	8.29268	77.5805
1750.09	5714	16.9214	2.59278	80.4858
1749.48	5716	16.2961	3.29483	80.4091
1748.86	5718	15.7177	3.58986	80.6924
1748.25	5720	15.1993	3.88461	80.9161
1747.64	5722	14.8239	4.22739	80.9487
1747.03	5724	14.7483	4.52183	80.7298
1746.42	5726	15.0165	4.72361	80.2599
1745.81	5728	15.5586	4.89691	79.5445
1745.2	5730	16.3774	5.08826	78.5344
1744.59	5732	17.5275	5.31556	77.1569
1743.98	5734	18.9353	5.56149	75.5032
1743.38	5736	20.3423	5.83615	73.8215
1742.77	5738	21.5394	6.1541	72.3065
1742.16	5740	22.4566	6.45709	71.0863
1741.55	5742	23.0836	6.69175	70.2247
1740.95	5744	23.3622	6.8745	69.7633
1740.34	5746	23.2874	7.0166	69.696
1739.74	5748	22.9461	7.07689	69.977
1739.13	5750	22.4204	7.04371	70.5359
1738.53	5752	21.7028	6.93366	71.3636
1737.92	5754	20.7857	6.76172	72.4526
1737.32	5756	19.7445	6.5224	73.7331
1736.71	5758	18.6889	6.21121	75.0999
1736.11	5760	17.6557	5.86199	76.4823
1735.51	5762	16.6479	5.50398	77.8481
1734.91	5764	15.5787	5.4028	79.0185
1734.3	5766	14.5366	5.53643	79.927
1733.7	5768	14.4459	4.16491	81.3892
1733.1	5770	13.999	3.88668	82.1144
1732.5	5772	13.7682	3.55739	82.6744
1731.9	5774	13.5033	2.92646	83.5702
1731.3	5776	13.7026	2.94247	83.355
1730.7	5778	14.1005	2.71686	83.1826
1730.1	5780	14.5446	2.65006	82.8054
1729.51	5782	14.9658	2.94345	82.0907
1728.91	5784	15.5339	3.30837	81.1577
1728.31	5786	16.2394	3.74198	80.0186
1727.71	5788	17.0967	4.21257	78.6907
1727.12	5790	18.1331	4.70036	77.1665
1726.52	5792	19.3563	5.14759	75.4961
1725.92	5794	20.7441	5.56922	73.6867
1725.33	5796	22.275	5.9278	71.7973
1724.73	5798	23.911	6.29156	69.7975
1724.14	5800	25.58	6.67146	67.7485
1723.54	5802	27.237	7.06287	65.7001
1722.95	5804	28.8603	7.46552	63.6742
1722.36	5806	30.44	7.80914	61.7509
1721.76	5808	31.8479	8.14241	60.0097
1721.17	5810	32.7206	10.4792	56.8002
1720.58	5812	34.3278	6.512	59.1602
1719.99	5814	35.3356	6.31909	58.3453
1719.39	5816	36.2222	5.85016	57.9276
1718.8	5818	36.9393	5.05173	58.0089
1718.21	5820	37.625	3.95178	58.4232
1717.62	5822	36.5491	12.0045	51.4464
1717.03	5824	37.1636	12.8073	50.0292
1716.44	5826	37.8812	13.2483	48.8705
1715.85	5828	38.8207	12.9987	48.1806
1715.27	5830	40.0612	12.1795	47.7593
1714.68	5832	43.8532	0.89237	55.2545
1714.09	5834	45.1663	1.55589	53.2778
1713.5	5836	46.5973	2.21092	51.1918
1712.92	5838	48.1726	4.39342	47.434
1712.33	5840	49.9521	4.07181	45.9761
1711.74	5842	51.5205	3.8806	44.5989
1711.16	5844	52.7911	3.82406	43.3848
1710.57	5846	53.7442	3.86336	42.3924
1709.99	5848	54.3263	4.0354	41.6383
1709.4	5850	54.4384	4.46565	41.096
1708.82	5852	54.0683	5.18438	40.7473
1708.23	5854	53.2524	6.14677	40.6008
1707.65	5856	52.0941	7.27867	40.6273
1707.07	5858	50.654	8.44975	40.8963
1706.48	5860	49.0411	9.53275	41.4261
1705.9	5862	47.3085	10.5844	42.107
1705.32	5864	45.5302	11.682	42.7877
1704.74	5866	43.7122	12.7218	43.5661
1704.16	5868	41.8859	13.5021	44.612
1703.58	5870	40.0573	14.0724	45.8703
1703	5872	38.2568	14.614	47.1292
1702.42	5874	36.4555	15.1338	48.4108
1701.84	5876	34.6515	15.4952	49.8533
1701.26	5878	32.8751	15.7218	51.4031
1700.68	5880	31.1957	15.9268	52.8775
1700.1	5882	29.6522	16.0487	54.299
1699.52	5884	28.2659	15.9223	55.8118
1698.95	5886	27.0648	15.586	57.3492
1698.37	5888	26.0841	15.235	58.6809
1697.79	5890	25.3387	14.9532	59.7081
1697.22	5892	24.8061	14.6835	60.5104
1696.64	5894	24.4771	14.4243	61.0986
1696.07	5896	24.3639	14.2678	61.3683
1695.49	5898	24.4964	14.2415	61.262
1694.92	5900	24.8927	14.2778	60.8295
1694.34	5902	25.5536	14.348	60.0984
1693.77	5904	26.4384	14.5557	59.0059
1693.19	5906	27.5071	14.9696	57.5234
1692.62	5908	28.7444	15.5015	55.7541
1692.05	5910	30.1646	15.9969	53.8384
1691.47	5912	31.7125	16.4223	51.8652
1690.9	5914	33.2868	16.8043	49.9088
1690.33	5916	34.8111	17.1029	48.086
1689.76	5918	36.2709	17.2431	46.486
1689.19	5920	37.62	17.2885	45.0915
1688.62	5922	38.7887	17.3735	43.8378
1688.05	5924	39.752	17.5286	42.7194
1687.48	5926	40.5538	17.6611	41.7851
1686.91	5928	41.2033	17.7471	41.0496
1686.34	5930	41.6645	17.8641	40.4713
1685.77	5932	41.9558	18.0531	39.9911
1685.2	5934	42.1586	18.2398	39.6017
1684.64	5936	42.3164	18.3791	39.3045
1684.07	5938	42.3899	18.5075	39.1025
1683.5	5940	42.3641	18.6327	39.0032
1682.94	5942	42.269	18.682	39.049
1682.37	5944	42.1042	18.6533	39.2424
1681.8	5946	41.7916	18.6616	39.5468
1681.24	5948	41.2897	18.7911	39.9192
1680.67	5950	40.6102	18.9866	40.4032
1680.11	5952	39.7879	19.1709	41.0411
1679.54	5954	38.8292	19.3367	41.8341
1678.98	5956	37.7651	19.4716	42.7633
1678.42	5958	36.6411	19.5182	43.8408
1677.85	5960	35.4989	19.4423	45.0588
1677.29	5962	34.3399	19.2718	46.3882
1676.73	5964	33.1619	19.0214	47.8166
1676.16	5966	31.9699	18.7107	49.3194
1675.6	5968	30.7782	18.3893	50.8325
1675.04	5970	29.5962	18.0733	52.3305
1674.48	5972	28.441	17.6367	53.9223
1673.92	5974	27.3446	16.9941	55.6613
1673.36	5976	26.321	16.2338	57.4452
1672.8	5978	25.3793	15.429	59.1917
1672.24	5980	24.577	14.4348	60.9881
1671.68	5982	24.0315	13.1135	62.855
1671.12	5984	23.8192	11.5098	64.671
1670.56	5986	23.9573	9.73	66.3127
1670.01	5988	24.4719	7.7475	67.7806
1669.45	5990	25.3826	5.68136	68.936
1668.89	5992	26.6064	3.94785	69.4457
1668.34	5994	28.0565	2.89529	69.0482
1667.78	5996	29.7561	2.61304	67.6309
1667.22	5998	31.7526	2.95157	65.2958
1666.67	6000	33.8749	3.65839	62.4668
1666.11	6002	35.8564	4.62314	59.5205
1665.56	6004	37.5799	5.68276	56.7373
1665	6006	39.0712	6.65335	54.2755
1664.45	6008	40.3027	7.53562	52.1617
1663.89	6010	41.2152	8.43414	50.3506
1663.34	6012	41.8689	9.33604	48.795
1662.79	6014	42.4042	10.1312	47.4646
1662.23	6016	42.8647	10.8159	46.3194
1661.68	6018	43.1934	11.4736	45.333
1661.13	6020	43.3901	12.115	44.4949
1660.58	6022	43.5566	12.6483	43.7951
1660.03	6024	43.7583	13.0522	43.1895
1659.48	6026	43.9564	13.4044	42.6392
1658.93	6028	44.117	13.7636	42.1194
1658.37	6030	44.2727	14.0914	41.6359
1657.82	6032	44.4372	14.3472	41.2156
1657.28	6034	44.5351	14.5687	40.8962
1656.73	6036	44.5017	14.817	40.6813
1656.18	6038	44.3822	15.0681	40.5496
1655.63	6040	44.2501	15.271	40.4788
1655.08	6042	44.0972	15.4331	40.4697
1654.53	6044	43.8679	15.6086	40.5235
1653.99	6046	43.576	15.7773	40.6467
1653.44	6048	43.2869	15.9082	40.8048
1652.89	6050	43.0216	16.0184	40.96
1652.35	6052	42.7457	16.166	41.0884
1651.8	6054	42.4533	16.3578	41.1889
1651.25	6056	42.1888	16.5203	41.2909
1650.71	6058	41.9496	16.6313	41.4191
1650.17	6060	41.6799	16.7361	41.584
1649.62	6062	41.3682	16.8337	41.7981
1649.08	6064	41.0914	16.8316	42.0771
1648.53	6066	40.882	16.6954	42.4226
1647.99	6068	40.6844	16.5114	42.8042
1647.45	6070	40.4343	16.367	43.1986
1646.9	6072	40.1686	16.228	43.6035
1646.36	6074	39.9285	16.0452	44.0263
1645.82	6076	39.7044	15.8516	44.444
1645.28	6078	39.4516	15.691	44.8574
1644.74	6080	39.2005	15.492	45.3075
1644.2	6082	38.9699	15.1788	45.8513
1643.66	6084	38.7132	14.8082	46.4787
1643.12	6086	38.316	14.5084	47.1756
1642.58	6088	37.7641	14.296	47.94
1642.04	6090	37.0994	14.0972	48.8034
1641.5	6092	36.3606	13.8888	49.7506
1640.96	6094	35.5087	13.7095	50.7817
1640.42	6096	34.5564	13.5349	51.9087
1639.88	6098	33.5344	13.3105	53.1551
1639.34	6100	32.452	13.0253	54.5227
1638.81	6102	31.2697	12.7525	55.9779
1638.27	6104	30.037	12.5009	57.4621
1637.73	6106	28.8579	12.1863	58.9558
1637.2	6108	27.7383	11.7946	60.4671
1636.66	6110	26.59	11.3895	62.0205
1636.13	6112	25.3529	11.043	63.6041
1635.59	6114	24.0952	10.7291	65.1757
1635.06	6116	22.8855	10.4044	66.7101
1634.52	6118	21.7608	10.0667	68.1725
1633.99	6120	20.6896	9.74168	69.5687
1633.45	6122	19.689	9.41901	70.892
1632.92	6124	18.7466	9.06962	72.1837
1632.39	6126	17.8599	8.67292	73.4672
1631.85	6128	16.9762	8.22728	74.7965
1631.32	6130	16.1266	7.72654	76.1468
1630.79	6132	15.3239	7.18483	77.4913
1630.26	6134	14.5988	6.64755	78.7536
1629.73	6136	13.9287	6.16748	79.9039
1629.2	6138	13.3459	5.75627	80.8979
1628.66	6140	12.8562	5.40189	81.7419
1628.13	6142	12.4737	5.1013	82.425
1627.6	6144	12.1578	4.86441	82.9778
1627.07	6146	11.8707	4.70418	83.4251
1626.55	6148	11.5566	4.63169	83.8117
1626.02	6150	11.2121	4.63534	84.1525
1625.49	6152	10.8639	4.63738	84.4987
1624.96	6154	10.5615	4.53815	84.9004
1624.43	6156	10.3204	4.30756	85.372
1623.9	6158	10.1287	4.00977	85.8615
1623.38	6160	9.96979	3.71922	86.311
1622.85	6162	9.83502	3.48091	86.6841
1622.32	6164	9.71672	3.35278	86.9305
1621.8	6166	9.59708	3.3712	87.0317
1621.27	6168	9.47668	3.49431	87.029
1620.75	6170	9.34699	3.63036	87.0227
1620.22	6172	9.20704	3.72585	87.0671
1619.7	6174	9.04256	3.79008	87.1674
1619.17	6176	8.88132	3.80914	87.3095
1618.65	6178	8.75992	3.71233	87.5278
1618.12	6180	8.72679	3.43838	87.8348
1617.6	6182	8.77545	2.99772	88.2268
1617.08	6184	8.89758	2.41611	88.6863
1616.55	6186	9.06799	1.66591	89.2661
1616.03	6188	9.34508	0.131582	90.5233
1615.51	6190	8.8687	0.167329	90.964
1614.99	6192	8.9301	0.112771	90.9571
1614.47	6194	9.0577	0.0535173	90.8888
1613.94	6196	9.17596	0.0198847	90.8042
1613.42	6198	9.20479	0.0113401	90.7839
1612.9	6200	9.16371	0.00738981	90.8289
1612.38	6202	9.07796	0.00119578	90.9208
1611.86	6204	8.98633	0.00715462	91.0065
1611.34	6206	8.53892	2.54947	88.9116
1610.82	6208	8.73026	1.47765	89.7921
1610.31	6210	8.71933	0.642586	90.6381
1609.79	6212	8.5151	0.254191	91.2307
1609.27	6214	8.28695	0.114396	91.5987
1608.75	6216	8.07698	0.0495933	91.8734
1608.23	6218	7.90018	0.0177156	92.0821
1607.72	6220	7.80041	0.0123696	92.1872
1607.2	6222	7.78589	0.02493	92.1892
1606.68	6224	7.71771	0.0229691	92.2593
1606.17	6226	7.49147	5.2174e-05	92.5085
1605.65	6228	6.9368	0.0420122	93.0212
1605.14	6230	6.43394	0.120245	93.4458
1604.62	6232	6.08703	0.180418	93.7326
1604.11	6234	5.93698	0.192179	93.8708
1603.59	6236	5.99916	0.139043	93.8618
1603.08	6238	6.30609	0.0353074	93.6586
1602.56	6240	6.39652	0.000276737	93.6032
1602.05	6242	6.35113	0.0110695	93.6378
1601.54	6244	6.19636	0.00261763	93.801
1601.02	6246	6.06173	7.66783e-05	93.9382
1600.51	6248	6.03387	0.000151694	93.966
1600	6250	6.11523	0.0163547	93.8684
1599.49	6252	6.2399	0.107158	93.6529
1598.98	6254	6.34567	0.418912	93.2354
1598.47	6256	6.28531	1.08533	92.6294
1597.95	6258	6.09122	1.77864	92.1301
1597.44	6260	6.02567	1.84777	92.1266
1596.93	6262	6.09508	1.33033	92.5746
1596.42	6264	6.12626	0.632735	93.241
1595.91	6266	5.91767	0.1045	93.9778
1595.41	6268	5.39253	0.020893	94.5866
1594.9	6270	4.58446	0.216435	95.1991
1594.39	6272	4.17513	0.398464	95.4264
1593.88	6274	3.90261	0.533643	95.5637
1593.37	6276	0	2.9622	97.0378
1592.86	6278	5.23212	2.49951	92.2684
1592.36	6280	5.11103	3.05989	91.8291
1591.85	6282	5.0395	3.40731	91.5532
1591.34	6284	4.94075	3.82282	91.2364
1590.84	6286	4.77955	4.43804	90.7824
1590.33	6288	4.63953	5.03727	90.3232
1589.83	6290	4.57117	5.48911	89.9397
1589.32	6292	4.58556	5.74167	89.6728
1588.81	6294	4.68018	5.79271	89.5271
1588.31	6296	4.90729	5.49948	89.5932
1587.81	6298	5.2661	4.80896	89.9249
1587.3	6300	5.6973	3.78787	90.5148
1586.8	6302	6.08652	2.80521	91.1083
1586.29	6304	6.36449	2.25795	91.3776
1585.79	6306	6.53926	2.17456	91.2862
1585.29	6308	6.62085	2.46159	90.9176
1584.79	6310	6.61505	3.04766	90.3373
1584.28	6312	6.58771	3.59244	89.8198
1583.78	6314	6.59681	3.80507	89.5981
1583.28	6316	6.65077	3.73124	89.618
1582.78	6318	6.72545	3.65638	89.6182
1582.28	6320	6.81115	3.69607	89.4928
1581.78	6322	6.91869	3.71494	89.3664
1581.28	6324	7.04779	3.64615	89.3061
1580.78	6326	7.18067	3.62184	89.1975
1580.28	6328	7.30611	3.71602	88.9779
1579.78	6330	7.45442	3.64989	88.8957
1579.28	6332	7.62831	3.27048	89.1012
1578.78	6334	7.77705	2.85447	89.3685
1578.28	6336	7.84693	2.72317	89.4299
1577.78	6338	7.83849	2.70557	89.4559
1577.29	6340	7.75227	2.6215	89.6262
1576.79	6342	7.5573	2.66706	89.7756
1576.29	6344	7.24907	3.06542	89.6855
1575.8	6346	6.91905	3.50908	89.5719
1575.3	6348	6.6886	3.67261	89.6388
1574.8	6350	6.61266	3.64365	89.7437
1574.31	6352	6.66019	3.76143	89.5784
1573.81	6354	6.76188	4.05919	89.1789
1573.32	6356	6.81799	4.3935	88.7885
1572.82	6358	6.74728	4.7105	88.5422
1572.33	6360	6.54124	5.03924	88.4195
1571.83	6362	6.25672	5.33963	88.4036
1571.34	6364	5.9892	5.50172	88.5091
1570.85	6366	5.82113	5.47564	88.7032
1570.35	6368	5.73742	5.42835	88.8342
1569.86	6370	5.66923	5.47436	88.8564
1569.37	6372	5.56843	5.53268	88.8989
1568.87	6374	5.43629	5.50289	89.0608
1568.38	6376	5.30216	5.40947	89.2884
1567.89	6378	5.18222	5.32988	89.4879
1567.4	6380	5.06675	5.26986	89.6634
1566.91	6382	4.94043	5.20028	89.8593
1566.42	6384	4.78068	5.17569	90.0436
1565.93	6386	4.57355	5.28667	90.1398
1565.44	6388	4.3043	5.50314	90.1926
1564.95	6390	3.99014	5.7025	90.3074
1564.46	6392	3.68357	5.83191	90.4845
1563.97	6394	3.42006	6.02138	90.5586
1563.48	6396	3.19697	6.29686	90.5062
1562.99	6398	3.00593	6.52437	90.4697
1562.5	6400	2.8322	6.58908	90.5787
1562.01	6402	2.6481	6.59335	90.7585
1561.52	6404	2.45855	6.56226	90.9792
1561.04	6406	2.31236	6.39438	91.2933
1560.55	6408	2.24982	6.02477	91.7254
1560.06	6410	2.2584	5.62564	92.116
1559.58	6412	2.273	5.33033	92.3967
1559.09	6414	2.21176	5.08937	92.6989
1558.6	6416	2.02198	4.80969	93.1683
1558.12	6418	1.69557	4.57897	93.7255
1557.63	6420	1.28613	4.47542	94.2384
1557.15	6422	0.876227	4.39578	94.728
1556.66	6424	0.508566	4.18119	95.3102
1556.18	6426	0.173047	3.91113	95.9158
1555.69	6428	0	3.81025	96.1898
1555.21	6430	0	3.91769	96.0823
1554.73	6432	0	4.10325	95.8968
1554.24	6434	0	4.34635	95.6536
1553.76	6436	0	4.7905	95.2095
1553.28	6438	0	5.33335	94.6666
1552.8	6440	0	5.58082	94.4192
1552.31	6442	0	5.30612	94.6939
1551.83	6444	0	4.78809	95.2119
1551.35	6446	0	4.35198	95.648
1550.87	6448	0	3.98147	96.0185
1550.39	6450	0	3.57172	96.4283
1549.91	6452	0	3.30555	96.6944
1549.43	6454	0	3.32715	96.6729
1548.95	6456	0	3.41816	96.5818
1548.47	6458	0	3.28772	96.7123
1547.99	6460	0	3.05716	96.9428
1547.51	6462	0	3.00829	96.9917
1547.03	6464	0	3.08619	96.9138
1546.55	6466	0	2.98802	97.012
1546.07	6468	0	2.81059	97.1894
1545.6	6470	0	2.96653	97.0335
1545.12	6472	0	3.35234	96.6477
1544.64	6474	0	3.45689	96.5431
1544.16	6476	0	3.2543	96.7457
1543.69	6478	0.171539	3.13421	96.6943
1543.21	6480	0.463034	3.20176	96.3352
1542.73	6482	0.790865	3.12093	96.0882
1542.26	6484	1.1685	2.77637	96.0551
1541.78	6486	1.54666	2.58508	95.8683
1541.31	6488	1.8849	2.7515	95.3636
1540.83	6490	2.15777	2.97915	94.8631
1540.36	6492	2.27873	3.08261	94.6387
1539.88	6494	2.18	3.31264	94.5074
1539.41	6496	1.86365	3.83185	94.3045
1538.94	6498	1.43972	4.33809	94.2222
1538.46	6500	0.993624	4.53057	94.4758
1537.99	6502	0.574009	4.60804	94.8179
1537.52	6504	0.183738	4.87533	94.9409
1537.04	6506	0	5.20645	94.7936
1536.57	6508	0	5.22681	94.7732
1536.1	6510	0.0559004	5.02599	94.9181
1535.63	6512	0.250574	5.33728	94.4121
1535.16	6514	0.416996	6.00828	93.5747
1534.68	6516	0.727978	6.11055	93.1615
1534.21	6518	0	2.03306e-16	100
1533.74	6520	0	1.21113e-16	100
1533.27	6522	0	6.69869e-17	100
1532.8	6524	0	0.0125111	99.9875
1532.33	6526	0	0.00148607	99.9985
1531.86	6528	0	0.0702687	99.9297
1531.39	6530	0	0.0329903	99.967
1530.92	6532	0	0.0428271	99.9572
1530.46	6534	0	0.0426804	99.9573
1529.99	6536	0	0.0601589	99.9398
1529.52	6538	0	0.0707297	99.9293
1529.05	6540	0	0.0910223	99.909
1528.58	6542	0	0.0777601	99.9222
1528.12	6544	0	0.0818786	99.9181
1527.65	6546	0	0.107912	99.8921
1527.18	6548	0	0.167165	99.8328
1526.72	6550	0	0.245186	99.7548
1526.25	6552	2.27428	1.88771	95.838
1525.79	6554	2.47642	1.73937	95.7842
1525.32	6556	2.77837	1.63134	95.5903
1524.86	6558	3.04402	1.74015	95.2158
1524.39	6560	3.27641	1.89876	94.8248
1523.93	6562	3.44653	2.05773	94.4957
1523.46	6564	3.53298	2.25992	94.2071
1523	6566	3.5171	2.47949	94.0034
1522.53	6568	3.45083	2.7415	93.8077
1522.07	6570	3.36466	3.19783	93.4375
1521.61	6572	3.25567	3.97055	92.7738
1521.14	6574	3.11619	4.88413	91.9997
1520.68	6576	3.00008	5.64884	91.3511
1520.22	6578	2.94074	6.3072	90.7521
1519.76	6580	2.94741	7.03957	90.013
1519.3	6582	3.06339	7.71392	89.2227
1518.83	6584	3.29535	8.14546	88.5592
1518.37	6586	3.54702	8.52656	87.9264
1517.91	6588	3.71921	9.16243	87.1184
1517.45	6590	3.84993	9.89289	86.2572
1516.99	6592	4.06154	10.3348	85.6036
1516.53	6594	4.38756	10.5414	85.0711
1516.07	6596	4.78236	10.8299	84.3877
1515.61	6598	5.19865	11.2452	83.5562
1515.15	6600	5.59934	11.5846	82.8161
1514.69	6602	5.90868	11.8009	82.2904
1514.23	6604	6.07803	11.9437	81.9783
1513.78	6606	6.10419	11.9706	81.9253
1513.32	6608	6.05377	11.7416	82.2046
1512.86	6610	5.97389	11.3047	82.7214
1512.4	6612	5.87255	10.867	83.2604
1511.94	6614	5.74481	10.586	83.6692
1511.49	6616	5.65556	10.393	83.9514
1511.03	6618	5.64563	10.2248	84.1296
1510.57	6620	5.68963	10.1197	84.1906
1510.12	6622	5.73524	10.1026	84.1621
1509.66	6624	5.81471	9.99387	84.1914
1509.21	6626	5.97788	9.63022	84.3919
1508.75	6628	6.19066	9.07779	84.7315
1508.3	6630	6.34668	8.5478	85.1055
1507.84	6632	6.41762	8.08743	85.4949
1507.39	6634	6.44989	7.66853	85.8816
1506.93	6636	6.46943	7.31912	86.2115
1506.48	6638	6.46244	7.12612	86.4114
1506.02	6640	6.45937	7.07905	86.4616
1505.57	6642	6.50443	7.0876	86.408
1505.12	6644	6.58607	7.13135	86.2826
1504.66	6646	6.66169	7.29255	86.0458
1504.21	6648	6.72275	7.58554	85.6917
1503.76	6650	6.80107	7.85879	85.3401
1503.31	6652	6.9058	8.02753	85.0667
1502.86	6654	7.01214	8.18099	84.8069
1502.4	6656	7.09631	8.40675	84.4969
1501.95	6658	7.17618	8.58975	84.2341
1501.5	6660	7.26006	8.61899	84.121
1501.05	6662	7.34466	8.56866	84.0867
1500.6	6664	7.43767	8.55677	84.0056
1500.15	6666	7.59356	8.48164	83.9248
1499.7	6668	7.83797	8.24598	83.916
1499.25	6670	8.12419	8.00419	83.8716
1498.8	6672	8.41573	7.9362	83.6481
1498.35	6674	8.71791	7.98083	83.3013
1497.9	6676	9.02542	8.02042	82.9542
1497.45	6678	9.32428	8.06239	82.6133
1497.01	6680	9.5634	8.1715	82.2651
1496.56	6682	9.71374	8.31135	81.9749
1496.11	6684	9.77303	8.39667	81.8303
1495.66	6686	9.79023	8.43702	81.7728
1495.22	6688	9.80253	8.55479	81.6427
1494.77	6690	9.83013	8.79582	81.374
1494.32	6692	9.84976	9.058	81.0922
1493.88	6694	9.81955	9.2623	80.9182
1493.43	6696	9.72213	9.44955	80.8283
1492.98	6698	9.61195	9.61647	80.7716
1492.54	6700	9.57616	9.59895	80.8249
1492.09	6702	9.66013	9.27699	81.0629
1491.65	6704	9.82567	8.79768	81.3766
1491.2	6706	10.004	8.39803	81.598
1490.76	6708	10.1762	8.10208	81.7217
1490.31	6710	10.3486	7.84896	81.8024
1489.87	6712	10.5015	7.69965	81.7988
1489.43	6714	10.6039	7.74344	81.6527
1488.98	6716	10.6783	7.84819	81.4735
1488.54	6718	10.7741	7.83941	81.3865
1488.1	6720	10.9228	7.76366	81.3136
1487.65	6722	11.1237	7.79542	81.0809
1487.21	6724	11.3696	7.91422	80.7162
1486.77	6726	11.6478	7.97515	80.3771
1486.33	6728	11.9402	7.95391	80.1059
1485.88	6730	12.2104	7.97709	79.8125
1485.44	6732	12.4505	8.09261	79.4569
1485	6734	12.7167	8.16897	79.1144
1484.56	6736	13.0751	8.12121	78.8036
1484.12	6738	13.5201	8.06518	78.4147
1483.68	6740	14	8.07917	77.9208
1483.24	6742	14.4719	8.04395	77.4841
1482.8	6744	14.8512	7.85802	77.2908
1482.36	6746	15.1029	7.65739	77.2397
1481.92	6748	15.2475	7.58226	77.1702
1481.48	6750	15.3591	7.52878	77.1121
1481.04	6752	15.521	7.3911	77.0879
1480.6	6754	15.7517	7.30414	76.9441
1480.17	6756	16.0388	7.42199	76.5392
1479.73	6758	16.3721	7.64131	75.9866
1479.29	6760	16.7462	7.76985	75.484
1478.85	6762	17.1241	7.85709	75.0188
1478.42	6764	17.4623	8.09677	74.4409
1477.98	6766	17.7448	8.50553	73.7496
1477.54	6768	17.9971	8.88016	73.1228
1477.1	6770	18.2276	9.13189	72.6406
1476.67	6772	18.4507	9.3211	72.2282
1476.23	6774	18.695	9.4619	71.8431
1475.8	6776	18.9947	9.38011	71.6252
1475.36	6778	19.345	9.07173	71.5833
1474.93	6780	19.7056	8.75272	71.5417
1474.49	6782	20.0501	8.58856	71.3614
1474.06	6784	20.394	8.47912	71.1269
1473.62	6786	20.758	8.3435	70.8985
1473.19	6788	21.1201	8.29542	70.5845
1472.75	6790	21.4536	8.43195	70.1144
1472.32	6792	21.7423	8.57846	69.6792
1471.89	6794	21.9716	8.57335	69.4551
1471.45	6796	22.1256	8.53068	69.3437
1471.02	6798	22.232	8.62926	69.1388
1470.59	6800	22.3583	8.79308	68.8487
1470.16	6802	22.5695	8.8362	68.5943
1469.72	6804	22.8375	8.78103	68.3814
1469.29	6806	23.0722	8.81246	68.1154
1468.86	6808	23.2516	8.94542	67.803
1468.43	6810	23.4428	9.00854	67.5487
1468	6812	23.657	8.94685	67.3962
1467.57	6814	23.7636	8.88534	67.3511
1467.14	6816	23.6562	8.88577	67.458
1466.71	6818	23.3734	8.79407	67.8325
1466.28	6820	23.0287	8.5443	68.427
1465.85	6822	22.6802	8.30871	69.0111
1465.42	6824	22.3829	8.21425	69.4029
1464.99	6826	22.2514	8.06979	69.6788
1464.56	6828	22.3436	7.74324	69.9132
1464.13	6830	22.55	7.39524	70.0548
1463.7	6832	22.6958	7.22052	70.0837
1463.27	6834	22.6765	7.12426	70.1993
1462.84	6836	22.4644	6.95609	70.5795
1462.42	6838	22.0507	6.80896	71.1404
1461.99	6840	21.4879	6.86162	71.6505
1461.56	6842	20.9346	6.98382	72.0816
1461.13	6844	20.5295	6.91874	72.5518
1460.71	6846	20.2436	6.70299	73.0535
1460.28	6848	19.9818	6.60107	73.4171
1459.85	6850	19.7463	6.59802	73.6557
1459.43	6852	19.6077	6.39503	73.9973
1459	6854	19.5524	5.86271	74.5849
1458.58	6856	19.4689	5.18107	75.35
1458.15	6858	19.315	4.53957	76.1454
1457.73	6860	19.1642	4.00049	76.8354
1457.3	6862	19.0891	3.65483	77.2561
1456.88	6864	19.0747	3.64574	77.2795
1456.45	6866	19.0792	3.98477	76.9361
1456.03	6868	19.0527	4.47595	76.4714
1455.6	6870	18.9574	4.93357	76.1091
1455.18	6872	18.7217	5.44544	75.8328
1454.76	6874	18.3308	6.16974	75.4994
1454.33	6876	17.8487	7.05028	75.1011
1453.91	6878	17.3448	7.85043	74.8048
1453.49	6880	16.7639	8.4741	74.762
1453.07	6882	16.0108	9.01622	74.9729
1452.64	6884	15.0793	9.54154	75.3792
1452.22	6886	14.11	9.99985	75.8901
1451.8	6888	13.2448	10.418	76.3373
1451.38	6890	12.565	10.9277	76.5073
1450.96	6892	12.0845	11.5705	76.3451
1450.54	6894	11.8295	12.232	75.9385
1450.12	6896	11.7577	12.8904	75.3519
1449.7	6898	11.8159	13.6631	74.521
1449.28	6900	11.9949	14.5848	73.4202
1448.86	6902	12.3641	15.5106	72.1253
1448.44	6904	12.9277	16.3451	70.7272
1448.02	6906	13.5676	17.162	69.2703
1447.6	6908	14.1038	18.0288	67.8674
1447.18	6910	14.4467	18.8793	66.674
1446.76	6912	14.6337	19.6205	65.7457
1446.34	6914	14.7683	20.241	64.9907
1445.92	6916	14.9274	20.7378	64.3347
1445.5	6918	15.095	21.0093	63.8957
1445.09	6920	15.189	20.9617	63.8492
1444.67	6922	15.1208	20.6623	64.2169
1444.25	6924	14.9299	20.3014	64.7687
1443.83	6926	14.7184	20.01	65.2716
1443.42	6928	14.5951	19.801	65.6039
1443	6930	14.5515	19.6677	65.7808
1442.59	6932	14.5594	19.6315	65.8091
1442.17	6934	14.5654	19.6779	65.7567
1441.75	6936	14.563	19.7566	65.6804
1441.34	6938	14.5042	19.8598	65.636
1440.92	6940	14.3767	20.0487	65.5746
1440.51	6942	14.1691	20.3546	65.4762
1440.09	6944	13.9451	20.6684	65.3865
1439.68	6946	13.7434	20.8995	65.3572
1439.26	6948	13.5935	21.0653	65.3412
1438.85	6950	13.4453	21.3026	65.2522
1438.43	6952	13.2284	21.6914	65.0802
1438.02	6954	12.8587	22.2015	64.9398
1437.61	6956	12.3252	22.7436	64.9312
1437.19	6958	11.6914	23.2299	65.0787
1436.78	6960	11.0685	23.5856	65.3459
1436.37	6962	10.5374	23.7586	65.7039
1435.96	6964	10.1341	23.7644	66.1015
1435.54	6966	9.84852	23.6843	66.4672
1435.13	6968	9.62983	23.6012	66.769
1434.72	6970	9.3893	23.563	67.0477
1434.31	6972	9.05365	23.5842	67.3621
1433.9	6974	8.63013	23.6314	67.7385
1433.49	6976	8.1733	23.6213	68.2054
1433.08	6978	7.73179	23.4505	68.8177
1432.66	6980	7.31849	23.0914	69.5901
1432.25	6982	6.94928	22.6118	70.4389
1431.84	6984	6.6336	22.1157	71.2507
1431.43	6986	6.36176	21.6494	71.9889
1431.02	6988	6.10842	21.1992	72.6924
1430.62	6990	5.88115	20.7044	73.4145
1430.21	6992	5.69677	20.1082	74.195
1429.8	6994	5.53288	19.391	75.0761
1429.39	6996	5.33566	18.5953	76.069
1428.98	6998	5.089	17.7786	77.1324
1428.57	7000	4.82944	16.9845	78.1861
1428.16	7002	4.59522	16.2262	79.1786
1427.76	7004	4.39758	15.4941	80.1083
1427.35	7006	4.26579	14.7443	80.9899
1426.94	7008	4.25672	13.922	81.8213
1426.53	7010	4.38977	13.0147	82.5956
1426.13	7012	4.60298	12.0733	83.3237
1425.72	7014	4.82041	11.1574	84.0222
1425.31	7016	5.03322	10.285	84.6817
1424.91	7018	5.273	9.44628	85.2807
1424.5	7020	5.53712	8.65008	85.8128
1424.1	7022	5.78464	7.91917	86.2962
1423.69	7024	5.99835	7.26878	86.7329
1423.28	7026	6.18759	6.70461	87.1078
1422.88	7028	6.3532	6.21548	87.4313
1422.48	7030	6.47539	5.80457	87.72
1422.07	7032	6.55898	5.4745	87.9665
1421.67	7034	6.64357	5.21441	88.142
1421.26	7036	6.74536	4.99804	88.2566
1420.86	7038	6.84093	4.82743	88.3316
1420.45	7040	6.92464	4.71499	88.3604
1420.05	7042	7.02885	4.68472	88.2864
1419.65	7044	7.164	4.73253	88.1035
1419.24	7046	7.28208	4.846	87.8719
1418.84	7048	7.32446	4.99788	87.6777
1418.44	7050	7.28874	5.17177	87.5395
1418.04	7052	7.15495	5.49008	87.355
1417.64	7054	6.95359	5.97255	87.0739
1417.23	7056	6.60982	6.83104	86.5591
1416.83	7058	0	0.246691	99.7533
1416.43	7060	0	0.243513	99.7565
1416.03	7062	0	0.227098	99.7729
1415.63	7064	0	0.141256	99.8587
1415.23	7066	6.45673	7.50575	86.0375
1414.83	7068	7.11411	6.0358	86.8501
1414.43	7070	7.41073	4.77114	87.8181
1414.03	7072	7.54117	3.52706	88.9318
1413.63	7074	7.40348	2.26573	90.3308
1413.23	7076	7.03314	1.29907	91.6678
1412.83	7078	7.0003	5.53249	87.4672
1412.43	7080	6.76304	5.98764	87.2493
1412.03	7082	6.52754	6.17249	87.3
1411.63	7084	6.21927	6.41226	87.3685
1411.23	7086	5.90947	6.60144	87.4891
1410.84	7088	5.59694	6.76759	87.6355
1410.44	7090	5.28051	6.91383	87.8057
1410.04	7092	4.98522	6.9831	88.0317
1409.64	7094	4.72814	6.94357	88.3283
1409.24	7096	4.48942	6.85317	88.6574
1408.85	7098	4.24463	6.78119	88.9742
1408.45	7100	3.99133	6.72316	89.2855
1408.05	7102	3.75054	6.63896	89.6105
1407.66	7104	3.53599	6.52961	89.9344
1407.26	7106	3.35262	6.44526	90.2021
1406.87	7108	3.19745	6.38738	90.4152
1406.47	7110	3.06034	6.32572	90.6139
1406.07	7112	2.92328	6.25679	90.8199
1405.68	7114	2.77752	6.21736	91.0051
1405.28	7116	2.62743	6.20755	91.165
1404.89	7118	2.48808	6.19346	91.3185
1404.49	7120	2.37174	6.15673	91.4715
1404.1	7122	2.28595	6.11613	91.5979
1403.71	7124	2.23553	6.06994	91.6945
1403.31	7126	2.22816	5.97673	91.7951
1402.92	7128	2.2671	5.81723	91.9157
1402.52	7130	2.33708	5.63351	92.0294
1402.13	7132	2.39433	5.47401	92.1317
1401.74	7134	2.38602	5.3372	92.2768
1401.35	7136	2.30011	5.20434	92.4955
1400.95	7138	2.17354	5.08857	92.7379
1400.56	7140	2.04397	5.03084	92.9252
1400.17	7142	1.90735	5.04763	93.045
1399.78	7144	1.73873	5.12003	93.1412
1399.38	7146	1.55401	5.20391	93.2421
1398.99	7148	1.41303	5.25563	93.3313
1398.6	7150	1.34737	5.24633	93.4063
1398.21	7152	1.32671	5.18415	93.4891
1397.82	7154	1.31495	5.10096	93.5841
1397.43	7156	1.30592	5.02794	93.6661
1397.04	7158	1.31411	4.95552	93.7304
1396.65	7160	1.35581	4.85795	93.7862
1396.26	7162	1.43085	4.73893	93.8302
1395.87	7164	1.53842	4.64387	93.8177
1395.48	7166	1.67384	4.59809	93.7281
1395.09	7168	1.82938	4.56712	93.6035
1394.7	7170	2.00433	4.4897	93.506
1394.31	7172	2.20822	4.35421	93.4376
1393.92	7174	2.42827	4.18018	93.3915
1393.53	7176	2.61784	3.97217	93.41
1393.15	7178	2.73958	3.728	93.5324
1392.76	7180	2.80961	3.47321	93.7172
1392.37	7182	2.87281	3.23852	93.8887
1391.98	7184	2.9529	3.01281	94.0343
1391.59	7186	3.05765	2.7661	94.1763
1391.21	7188	3.20776	2.50371	94.2885
1390.82	7190	3.42577	2.2721	94.3021
1390.43	7192	3.68147	2.10792	94.2106
1390.05	7194	3.90144	2.0119	94.0867
1389.66	7196	4.03772	1.9698	93.9925
1389.27	7198	4.15692	1.94343	93.8997
1388.89	7200	4.31217	1.91092	93.7769
1388.5	7202	4.54887	1.80801	93.6431
1388.12	7204	4.83067	1.63533	93.534
1387.73	7206	5.0845	1.46338	93.4521
1387.35	7208	5.27482	1.31129	93.4139
1386.96	7210	5.39523	1.16152	93.4432
1386.58	7212	5.47262	1.00591	93.5215
1386.19	7214	5.52496	0.893586	93.5815
1385.81	7216	5.53118	0.85068	93.6181
1385.43	7218	5.40312	0.864396	93.7325
1385.04	7220	5.10132	0.890613	94.0081
1384.66	7222	4.75348	0.908249	94.3383
1384.27	7224	4.50362	0.915354	94.581
1383.89	7226	4.37887	0.889921	94.7312
1383.51	7228	4.29828	0.801873	94.8998
1383.13	7230	4.23644	0.674442	95.0891
1382.74	7232	4.22888	0.573106	95.198
1382.36	7234	4.27247	0.542479	95.185
1381.98	7236	4.29525	0.597176	95.1076
1381.6	7238	4.2857	0.709445	95.0049
1381.22	7240	4.34135	0.800123	94.8585
1380.83	7242	4.42936	0.997663	94.573
1380.45	7244	4.57791	1.1816	94.2405
1380.07	7246	4.81715	1.28842	93.8944
1379.69	7248	5.22383	1.31203	93.4641
1379.31	7250	5.78267	1.25589	92.9614
1378.93	7252	6.3588	0.937589	92.7036
1378.55	7254	6.08193	0.167753	93.7503
1378.17	7256	6.21252	0.619863	93.1676
1377.79	7258	5.9872	1.35582	92.657
1377.41	7260	5.48001	2.22175	92.2982
1377.03	7262	0	0.164693	99.8353
1376.65	7264	0	0.23507	99.7649
1376.27	7266	0	0.11591	99.8841
1375.89	7268	0	0.170193	99.8298
1375.52	7270	0	0.0748907	99.9251
1375.14	7272	0	0.2536	99.7464
1374.76	7274	0	0.372729	99.6273
1374.38	7276	0	0.395514	99.6045
1374	7278	0	0.470672	99.5293
1373.63	7280	6.21437	3.30882	90.4768
1373.25	7282	6.24366	3.79827	89.9581
1372.87	7284	6.23066	4.07038	89.699
1372.5	7286	6.13041	4.35114	89.5185
1372.12	7288	6.02754	4.91731	89.0552
1371.74	7290	6.10567	5.75079	88.1435
1371.37	7292	6.23429	6.72139	87.0443
1370.99	7294	6.21029	7.72489	86.0648
1370.61	7296	6.10252	8.71914	85.1783
1370.24	7298	6.2295	9.48968	84.2808
1369.86	7300	6.86667	9.81849	83.3148
1369.49	7302	7.96176	9.90284	82.1354
1369.11	7304	9.02062	10.0623	80.9171
1368.74	7306	9.50658	10.2183	80.2751
1368.36	7308	9.30652	10.3183	80.3752
1367.99	7310	8.76526	10.5387	80.696
1367.61	7312	8.27511	11.1248	80.6001
1367.24	7314	7.94585	11.8751	80.1791
1366.87	7316	7.66143	12.3243	80.0143
1366.49	7318	7.34944	12.4656	80.1849
1366.12	7320	7.12482	12.5322	80.343
1365.75	7322	7.06579	12.5459	80.3883
1365.37	7324	7.08843	12.3388	80.5727
1365	7326	7.06366	11.891	81.0453
1364.63	7328	7.02439	11.339	81.6366
1364.26	7330	7.01325	10.8662	82.1206
1363.88	7332	7.02715	10.5272	82.4456
1363.51	7334	7.04183	10.2908	82.6673
1363.14	7336	7.09154	10.0736	82.8348
1362.77	7338	7.1835	9.81001	83.0065
1362.4	7340	7.26752	9.42432	83.3082
1362.03	7342	7.30142	8.90542	83.7932
1361.66	7344	7.32575	8.31449	84.3598
1361.29	7346	7.37291	7.75316	84.8739
1360.91	7348	7.38822	7.30243	85.3093
1360.54	7350	7.31692	6.9854	85.6977
1360.17	7352	7.15498	6.80137	86.0437
1359.8	7354	6.95181	6.7092	86.339
1359.43	7356	6.71724	6.68199	86.6008
1359.06	7358	6.45373	6.6934	86.8529
1358.7	7360	6.14752	6.71368	87.1388
1358.33	7362	5.84648	6.6603	87.4932
1357.96	7364	5.58093	6.5155	87.9036
1357.59	7366	5.38135	6.31754	88.3011
1357.22	7368	5.29622	6.16165	88.5421
1356.85	7370	5.40685	6.06792	88.5252
1356.48	7372	5.66848	6.03329	88.2982
1356.12	7374	5.95498	5.98285	88.0622
1355.75	7376	6.14698	5.86715	87.9859
1355.38	7378	6.25547	5.64422	88.1003
1355.01	7380	6.32229	5.36266	88.3151
1354.65	7382	6.35549	5.07104	88.5735
1354.28	7384	6.76029	2.94256	90.2971
1353.91	7386	6.17416	4.63206	89.1938
1353.55	7388	5.98436	4.47884	89.5368
1353.18	7390	5.7401	4.33244	89.9275
1352.81	7392	5.43063	4.14421	90.4252
1352.45	7394	5.08686	3.88747	91.0257
1352.08	7396	4.74914	3.59585	91.655
1351.72	7398	4.41689	3.28975	92.2934
1351.35	7400	4.07814	3.00689	92.915
1350.99	7402	3.81986	2.75628	93.4239
1350.62	7404	3.75621	2.57792	93.6659
1350.26	7406	3.89259	2.46654	93.6409
1349.89	7408	4.11736	2.43133	93.4513
1349.53	7410	4.35561	2.41953	93.2249
1349.16	7412	4.60144	2.41756	92.981
1348.8	7414	4.86439	2.39639	92.7392
1348.44	7416	5.13427	2.33483	92.5309
1348.07	7418	5.39544	2.25514	92.3494
1347.71	7420	5.65656	2.18957	92.1539
1347.35	7422	5.91357	2.1753	91.9111
1346.98	7424	6.15522	2.22963	91.6151
1346.62	7426	6.36897	2.35618	91.2749
1346.26	7428	6.56147	2.53654	90.902
1345.9	7430	6.72491	2.74999	90.5251
1345.53	7432	6.84835	2.98425	90.1674
1345.17	7434	6.9225	3.24078	89.8367
1344.81	7436	6.97815	3.50712	89.5147
1344.45	7438	7.05595	3.75503	89.189
1344.09	7440	7.17578	3.96158	88.8626
1343.72	7442	7.33063	4.13959	88.5298
1343.36	7444	7.51815	4.30976	88.1721
1343	7446	7.74335	4.47318	87.7835
1342.64	7448	8.00113	4.61194	87.3869
1342.28	7450	8.26382	4.71138	87.0248
1341.92	7452	8.49796	4.77587	86.7262
1341.56	7454	8.67632	4.8368	86.4869
1341.2	7456	8.77905	4.93929	86.2817
1340.84	7458	8.79843	5.11558	86.086
1340.48	7460	8.73773	5.37211	85.8902
1340.12	7462	8.61537	5.66922	85.7154
1339.76	7464	8.47307	5.93038	85.5965
1339.41	7466	8.3555	6.11896	85.5255
1339.05	7468	8.30494	6.16235	85.5327
1338.69	7470	8.34501	6.03663	85.6184
1338.33	7472	8.4504	5.78175	85.7679
1337.97	7474	8.57527	5.49886	85.9259
1337.61	7476	8.66299	5.2994	86.0376
1337.26	7478	8.68859	5.25323	86.0582
1336.9	7480	8.65241	5.35408	85.9935
1336.54	7482	8.58634	5.54703	85.8666
1336.18	7484	8.51591	5.74787	85.7362
1335.83	7486	8.46752	5.88941	85.6431
1335.47	7488	8.44408	5.94103	85.6149
1335.11	7490	8.44968	5.93505	85.6153
1334.76	7492	8.47944	5.9212	85.5994
1334.4	7494	8.53653	5.91547	85.548
1334.04	7496	8.58856	5.95934	85.4521
1333.69	7498	8.61042	6.04453	85.345
1333.33	7500	8.59545	6.16056	85.244
1332.98	7502	8.5648	6.27609	85.1591
1332.62	7504	8.52062	6.38995	85.0894
1332.27	7506	8.45506	6.46394	85.081
1331.91	7508	8.34429	6.50968	85.146
1331.56	7510	8.16439	6.54984	85.2858
1331.2	7512	7.91269	6.64125	85.4461
1330.85	7514	7.64145	6.80066	85.5579
1330.49	7516	7.44165	7.03982	85.5185
1330.14	7518	7.38021	7.31452	85.3053
1329.79	7520	7.43998	7.64153	84.9185
1329.43	7522	7.54705	8.00172	84.4512
1329.08	7524	7.65291	8.33709	84.01
1328.73	7526	7.74531	8.63355	83.6211
1328.37	7528	7.83122	8.90468	83.2641
1328.02	7530	7.85843	9.20991	82.9317
1327.67	7532	7.76901	9.5668	82.6642
1327.32	7534	7.55354	9.92897	82.5175
1326.96	7536	7.27632	10.2189	82.5048
1326.61	7538	7.01706	10.3466	82.6363
1326.26	7540	6.81444	10.2757	82.9098
1325.91	7542	6.6875	9.96453	83.348
1325.56	7544	6.63311	9.42806	83.9388
1325.21	7546	6.60696	8.78515	84.6079
1324.85	7548	6.56065	8.20844	85.2309
1324.5	7550	6.49245	7.831	85.6765
1324.15	7552	6.4722	7.66673	85.8611
1323.8	7554	6.57375	7.63975	85.7865
1323.45	7556	6.82464	7.6082	85.5672
1323.1	7558	7.21139	7.40879	85.3798
1322.75	7560	7.71234	6.93264	85.355
1322.4	7562	8.27169	6.22744	85.5009
1322.05	7564	8.77545	5.48292	85.7416
1321.7	7566	9.102	4.88813	86.0099
1321.35	7568	9.18875	4.52277	86.2885
1321	7570	9.04874	4.39512	86.5561
1320.66	7572	8.73483	4.51334	86.7518
1320.31	7574	8.3306	4.92857	86.7408
1319.96	7576	7.91609	5.73486	86.3491
1319.61	7578	7.55488	6.91623	85.5289
1319.26	7580	7.28989	8.22023	84.4899
1318.91	7582	7.18268	9.28307	83.5342
1318.57	7584	7.27897	9.86377	82.8573
1318.22	7586	7.55387	10.0078	82.4384
1317.87	7588	7.88021	9.9974	82.1224
1317.52	7590	8.10224	10.129	81.7688
1317.18	7592	8.13116	10.4024	81.4665
1316.83	7594	7.98383	10.635	81.3812
1316.48	7596	7.7199	10.6929	81.5872
1316.14	7598	7.39922	10.5879	82.0129
1315.79	7600	7.0772	10.3757	82.5471
1315.44	7602	6.79332	10.0892	83.1175
1315.1	7604	6.52317	9.74668	83.7301
1314.75	7606	6.20341	9.37682	84.4198
1314.41	7608	5.82105	8.97278	85.2062
1314.06	7610	5.45187	8.4914	86.0567
1313.72	7612	5.18755	7.87247	86.94
1313.37	7614	5.06496	7.03446	87.9006
1313.03	7616	5.07041	5.93398	88.9956
1312.68	7618	5.18242	4.62509	90.1925
1312.34	7620	5.36665	3.33639	91.297
1311.99	7622	5.55798	2.35887	92.0832
1311.65	7624	5.69176	1.79518	92.5131
1311.3	7626	5.7026	1.63201	92.6654
1310.96	7628	5.69627	1.56643	92.7373
1310.62	7630	5.71368	1.47045	92.8159
1310.27	7632	5.73723	1.39551	92.8673
1309.93	7634	5.82715	1.72222	92.4506
1309.59	7636	6.0253	2.66281	91.3119
1309.24	7638	6.13383	4.45524	89.4109
1308.9	7640	0	1.09913e-15	100
1308.56	7642	7.80748	2.69077	89.5018
1308.22	7644	8.16849	2.18589	89.6456
1307.87	7646	7.42127	3.4568	89.1219
1307.53	7648	5.55393	7.06646	87.3796
1307.19	7650	0	0.104417	99.8956
1306.85	7652	5.04202	5.4259	89.5321
1306.51	7654	0	0.100085	99.8999
1306.17	7656	0	0.10438	99.8956
1305.82	7658	0	0.0944367	99.9056
1305.48	7660	0	0.134796	99.8652
1305.14	7662	0	0.196948	99.8031
1304.8	7664	0	0.180763	99.8192
1304.46	7666	0	0.269056	99.7309
1304.12	7668	0	0.280699	99.7193
1303.78	7670	0	0.367156	99.6328
1303.44	7672	0	0.44807	99.5519
1303.1	7674	0	0.348072	99.6519
1302.76	7676	0	0.209491	99.7905
1302.42	7678	0	0.411739	99.5883
1302.08	7680	0	0.335318	99.6647
1301.74	7682	0	0.31429	99.6857
1301.41	7684	0	5.64054e-16	100
1301.07	7686	0	4.49015e-16	100
1300.73	7688	0	2.21365e-16	100
1300.39	7690	4.14401	5.72913	90.1269
1300.05	7692	4.56112	6.02514	89.4137
1299.71	7694	4.88978	6.00596	89.1043
1299.38	7696	5.10701	5.88387	89.0091
1299.04	7698	5.21209	5.88854	88.8994
1298.7	7700	5.18614	6.31351	88.5004
1298.36	7702	5.13407	7.05336	87.8126
1298.03	7704	5.17106	7.85855	86.9704
1297.69	7706	5.33769	8.48933	86.173
1297.35	7708	5.57021	8.84735	85.5824
1297.02	7710	5.83511	8.95482	85.2101
1296.68	7712	6.19839	8.86167	84.9399
1296.34	7714	6.72144	8.59758	84.681
1296.01	7716	7.35087	8.18376	84.4654
1295.67	7718	7.94011	7.64767	84.4122
1295.34	7720	8.35357	7.0846	84.5618
1295	7722	8.5107	6.60708	84.8822
1294.67	7724	8.38405	6.28239	85.3336
1294.33	7726	8.02437	6.11311	85.8625
1294	7728	7.55355	6.04964	86.3968
1293.66	7730	7.06373	5.99512	86.9412
1293.33	7732	6.53902	5.90555	87.5554
1292.99	7734	5.91638	5.80306	88.2806
1292.66	7736	5.24728	5.73505	89.0177
1292.32	7738	4.72823	5.66922	89.6025
1291.99	7740	4.54331	5.45589	90.0008
1291.66	7742	4.72705	4.93354	90.3394
1291.32	7744	5.19246	4.02643	90.7811
1290.99	7746	5.77684	2.88635	91.3368
1290.66	7748	6.27825	1.95154	91.7702
1290.32	7750	6.54953	1.45096	91.9995
1289.99	7752	6.53287	1.22194	92.2452
1289.66	7754	6.28144	0.965985	92.7526
1289.32	7756	5.85923	0.456867	93.6839
1288.99	7758	5.05474	0.0106401	94.9346
1288.66	7760	0	2.60167	97.3983
1288.33	7762	0	2.65444	97.3456
1288	7764	0	2.59865	97.4014
1287.66	7766	0	2.44957	97.5504
1287.33	7768	0	2.17544	97.8246
1287	7770	0	1.84678	98.1532
1286.67	7772	0	1.58533	98.4147
1286.34	7774	0	1.37821	98.6218
1286.01	7776	0	1.1437	98.8563
1285.68	7778	0	1.04808	98.9519
1285.35	7780	0	1.02283	98.9772
1285.02	7782	2.37242	3.0624	94.5652
1284.69	7784	2.51633	4.46934	93.0143
1284.36	7786	2.71437	4.88814	92.3975
1284.03	7788	2.9796	4.99321	92.0272
1283.7	7790	3.31328	4.91933	91.7674
1283.37	7792	3.65808	4.72731	91.6146
1283.04	7794	3.94584	4.40116	91.653
1282.71	7796	4.16314	3.87789	91.959
1282.38	7798	4.30549	3.16282	92.5317
1282.05	7800	4.33691	2.35707	93.306
1281.72	7802	4.23627	1.55684	94.2069
1281.39	7804	4.03941	0.803864	95.1567
1281.07	7806	3.73122	0.265406	96.0034
1280.74	7808	3.2262	0.13966	96.6341
1280.41	7810	2.63294	0.0782942	97.2888
1280.08	7812	2.34173	2.92209	94.7362
1279.75	7814	1.48557	5.94156	92.5729
1279.43	7816	0.815434	7.44984	91.7347
1279.1	7818	0.39438	7.70959	91.896
1278.77	7820	0	1.35723e-17	100
1278.45	7822	0	7.49677e-17	100
1278.12	7824	0	2.59093e-16	100
1277.79	7826	0	3.56985e-16	100
1277.47	7828	0	2.89605e-16	100
1277.14	7830	0	3.43912e-16	100
1276.81	7832	0	2.05278e-16	100
1276.49	7834	0	1.45159e-16	100
1276.16	7836	0	0.00363503	99.9964
1275.84	7838	0	4.36773e-17	100
1275.51	7840	0	1.8609e-17	100
1275.18	7842	0	7.12629e-17	100
1274.86	7844	0	1.19286e-16	100
1274.53	7846	0	8.76274e-17	100
1274.21	7848	0	3.61977e-16	100
1273.89	7850	0	2.9894e-16	100
1273.56	7852	0	4.79843e-16	100
1273.24	7854	0	3.56389e-16	100
1272.91	7856	0	5.04885e-16	100
1272.59	7858	0	2.23146e-16	100
1272.26	7860	0	3.92049e-16	100
1271.94	7862	0	5.93935e-16	100
1271.62	7864	0	6.87371e-16	100
1271.29	7866	0	7.10932e-16	100
1270.97	7868	0	7.19669e-16	100
1270.65	7870	0	3.9314e-16	100
1270.33	7872	0	1.83359e-16	100
1270	7874	0	0.0617277	99.9383
1269.68	7876	0	0.223807	99.7762
1269.36	7878	0	0.401673	99.5983
1269.04	7880	0	0.594938	99.4051
1268.71	7882	0	0.559931	99.4401
1268.39	7884	0	0.455616	99.5444
1268.07	7886	0	0.409241	99.5908
1267.75	7888	3.84948	1.33244	94.8181
1267.43	7890	0	0.337083	99.6629
1267.11	7892	0	0.247014	99.753
1266.78	7894	0	0.190081	99.8099
1266.46	7896	0	0.163692	99.8363
1266.14	7898	0	0.130684	99.8693
1265.82	7900	0	0.12625	99.8738
1265.5	7902	0	5.90743e-17	100
1265.18	7904	0	0.0374936	99.9625
1264.86	7906	0	4.22147e-16	100
1264.54	7908	0	5.91386e-16	100
1264.22	7910	0	5.79966e-16	100
1263.9	7912	0	4.94717e-16	100
1263.58	7914	0	1.46348e-16	100
1263.26	7916	0	5.67873e-16	100
1262.95	7918	0	4.74208e-16	100
1262.63	7920	0	2.70413e-16	100
1262.31	7922	0	1.37004e-16	100
1261.99	7924	0	1.4433e-16	100
1261.67	7926	0	2.70123e-16	100
1261.35	7928	0	4.02179e-16	100
1261.03	7930	0	4.67664e-16	100
1260.72	7932	0	4.13699e-16	100
1260.4	7934	0	1.75213e-16	100
1260.08	7936	0	2.28802e-16	100
1259.76	7938	0	0.28427	99.7157
1259.45	7940	0	0.507686	99.4923
1259.13	7942	0	0.748822	99.2512
1258.81	7944	0	0.954022	99.046
1258.49	7946	0	1.06805	98.932
1258.18	7948	0	1.1294	98.8706
1257.86	7950	3.28749	0.0472407	96.6653
1257.55	7952	3.68188	2.26054	94.0576
1257.23	7954	0	0.315427	99.6846
1256.91	7956	0	0.395856	99.6041
1256.6	7958	0	0.398112	99.6019
1256.28	7960	0	0.37779	99.6222
1255.97	7962	0	0.422368	99.5776
1255.65	7964	0	0.339077	99.6609
1255.34	7966	0	0.396132	99.6039
1255.02	7968	0	0.413379	99.5866
1254.71	7970	3.15503	8.9623	87.8827
1254.39	7972	2.8091	9.93458	87.2563
1254.08	7974	2.42492	10.6687	86.9064
1253.76	7976	2.0179	11.1678	86.8143
1253.45	7978	1.60401	11.4614	86.9346
1253.13	7980	1.19661	11.5841	87.2193
1252.82	7982	0.804153	11.566	87.6298
1252.51	7984	0.432109	11.4326	88.1353
1252.19	7986	0.0825695	11.2022	88.7153
1251.88	7988	0	10.8719	89.1281
1251.56	7990	0	10.4726	89.5274
1251.25	7992	0	10.0293	89.9707
1250.94	7994	0	9.55275	90.4473
1250.63	7996	0	9.0526	90.9474
[truncated: 2 more rows]
